# Supplementary material for: Identification and Validation of a Metabolism-Related Prognostic Signature Associated with M2 Macrophage Infiltration in Gastric Cancer
Source: MDPI journal article supplement (doi:10.3390/ijms241310625), 2023-06-25

Risk low high

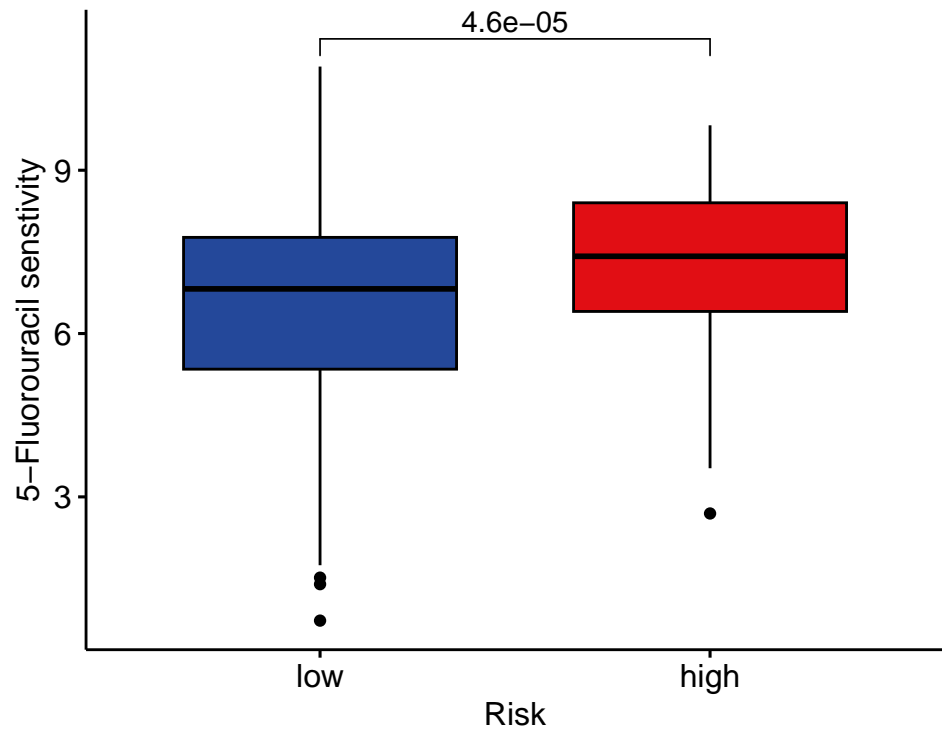

Risk  low  high

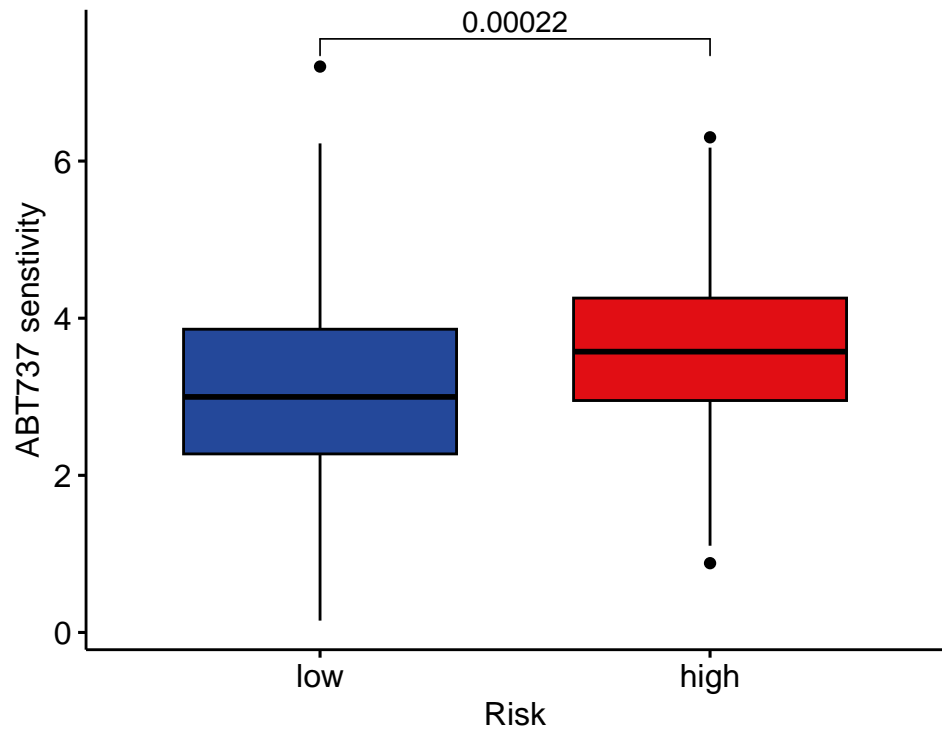

Risk low high

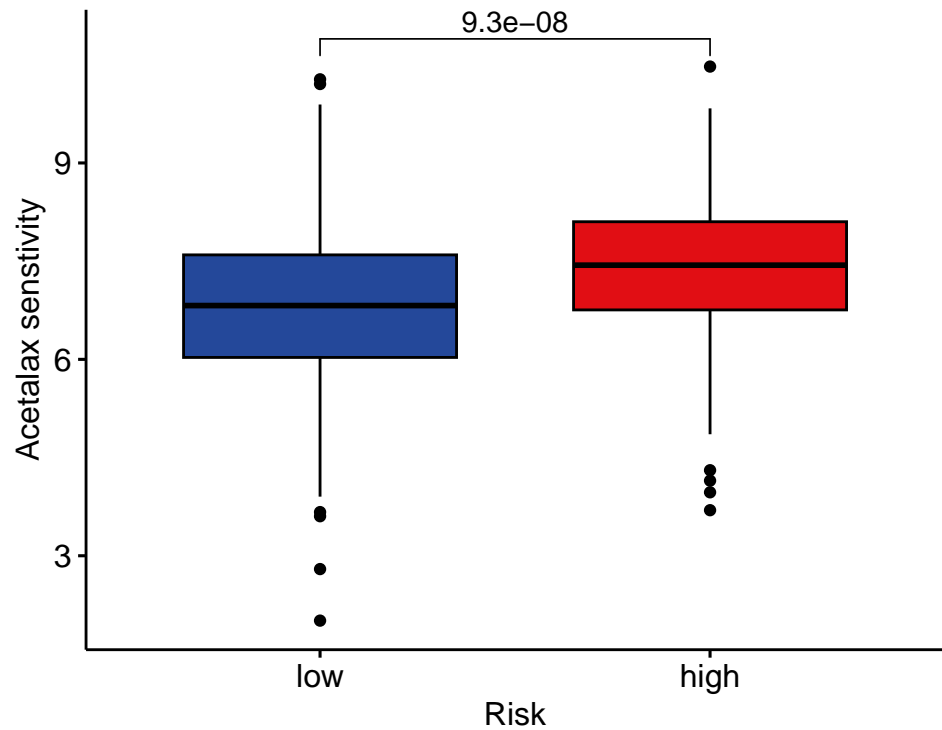

Risk  low  high

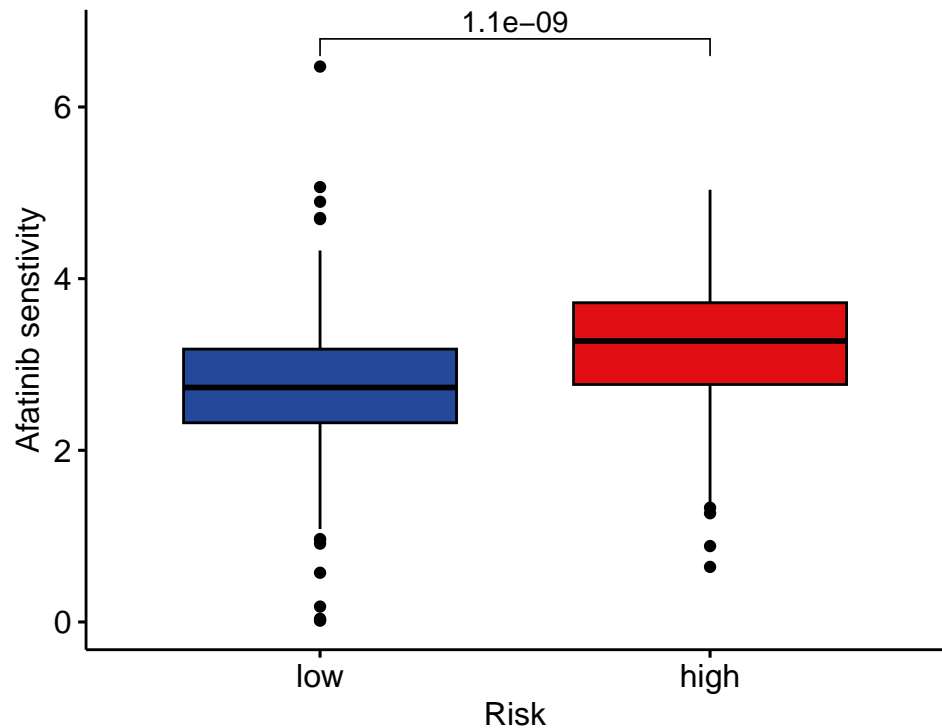

Risk  low  high

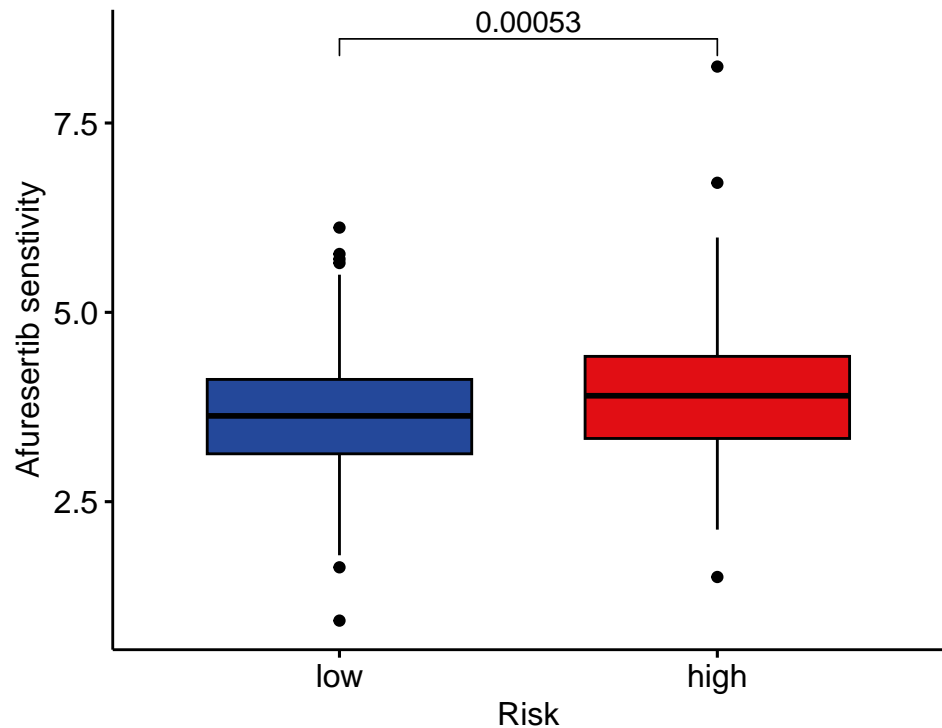

Risk  low  high

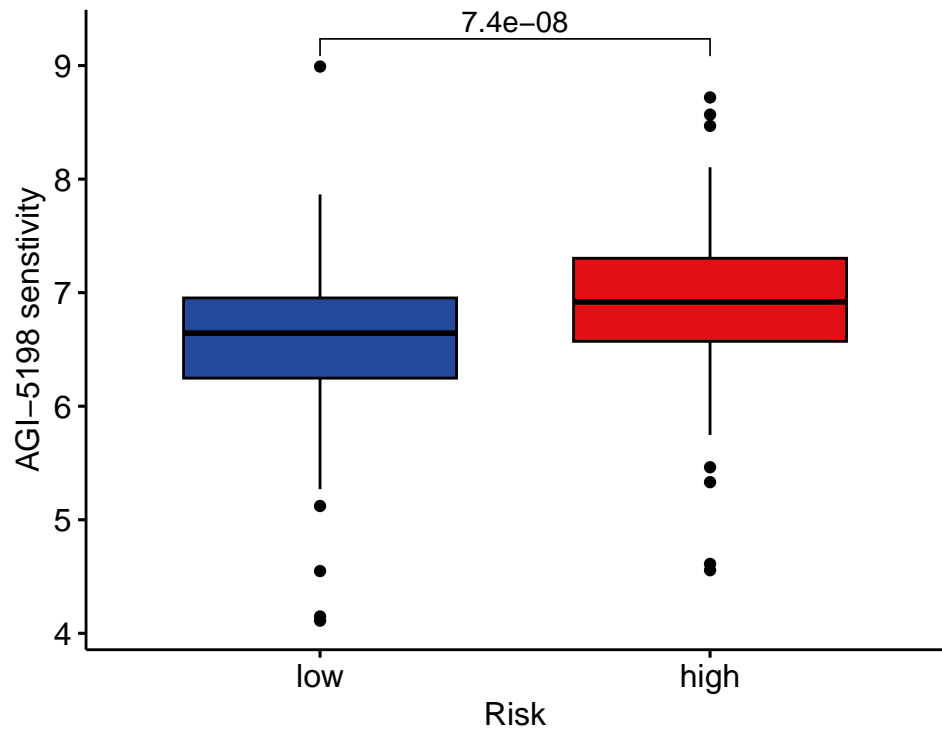

Risk low high

0.00037

Axitinib sensitivity

6  
5  
4  
3  
2  
1

low

high

Risk

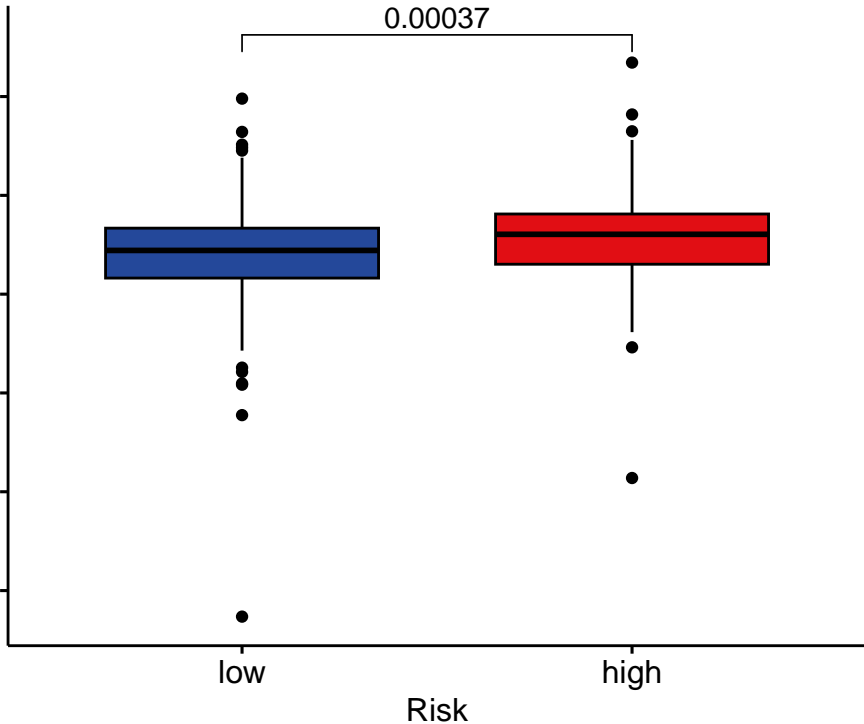

Risk low high

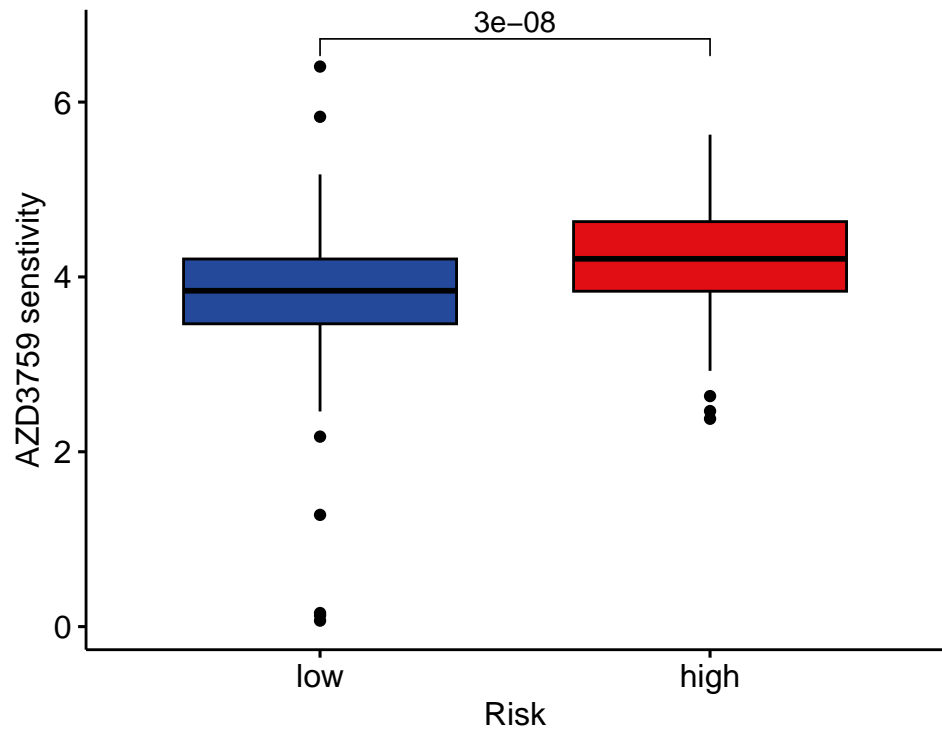



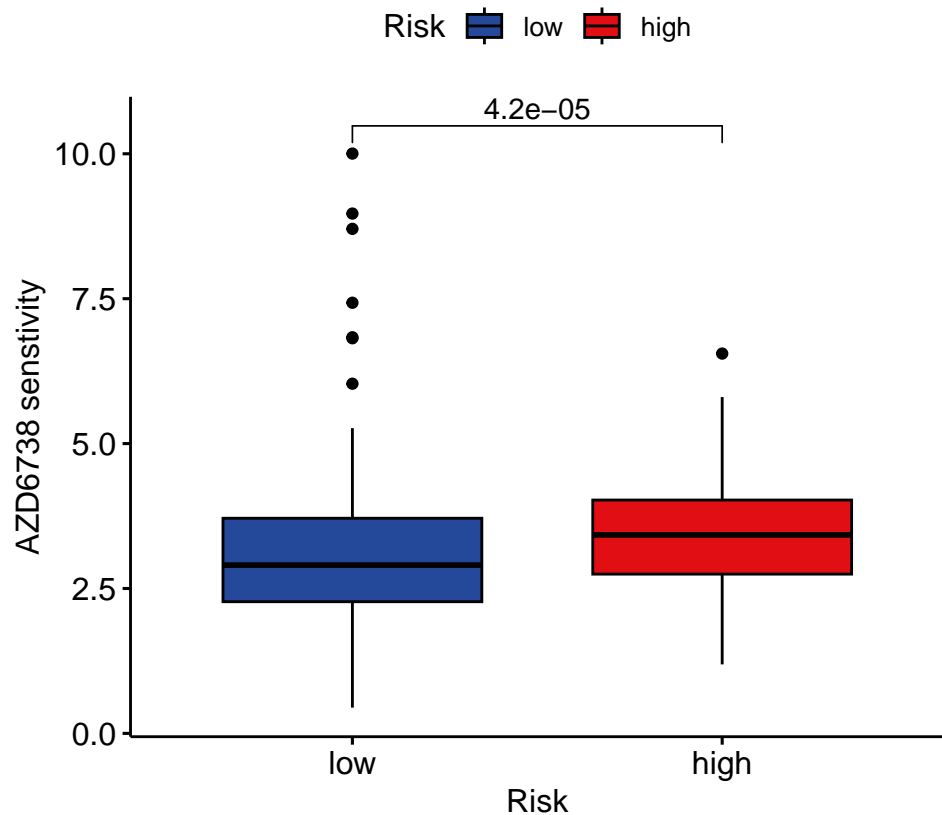

Risk low high

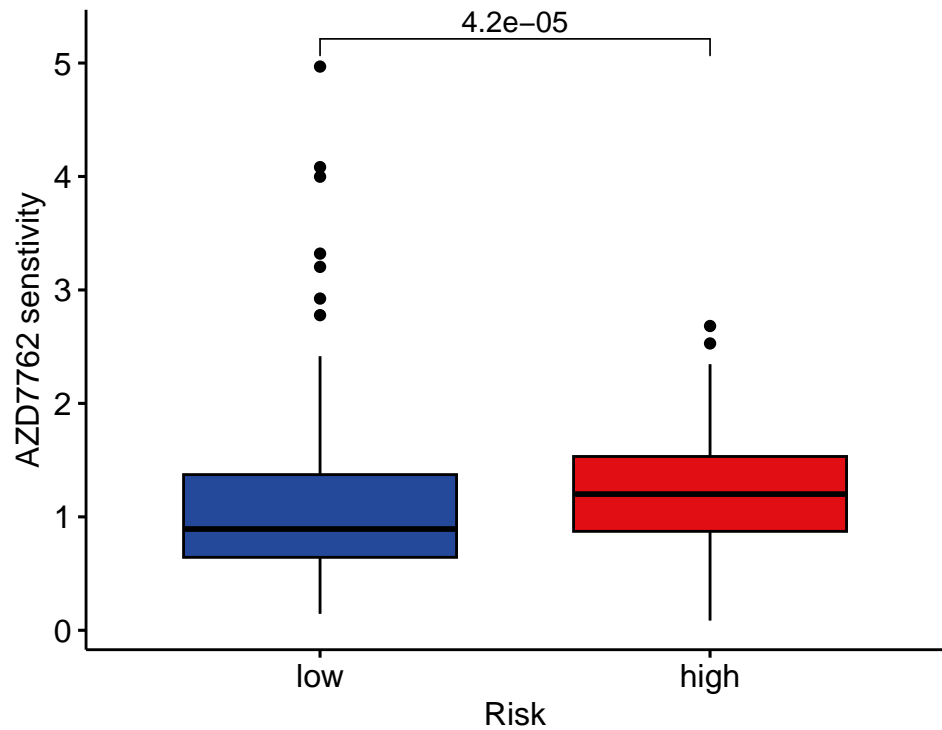

Risk low high

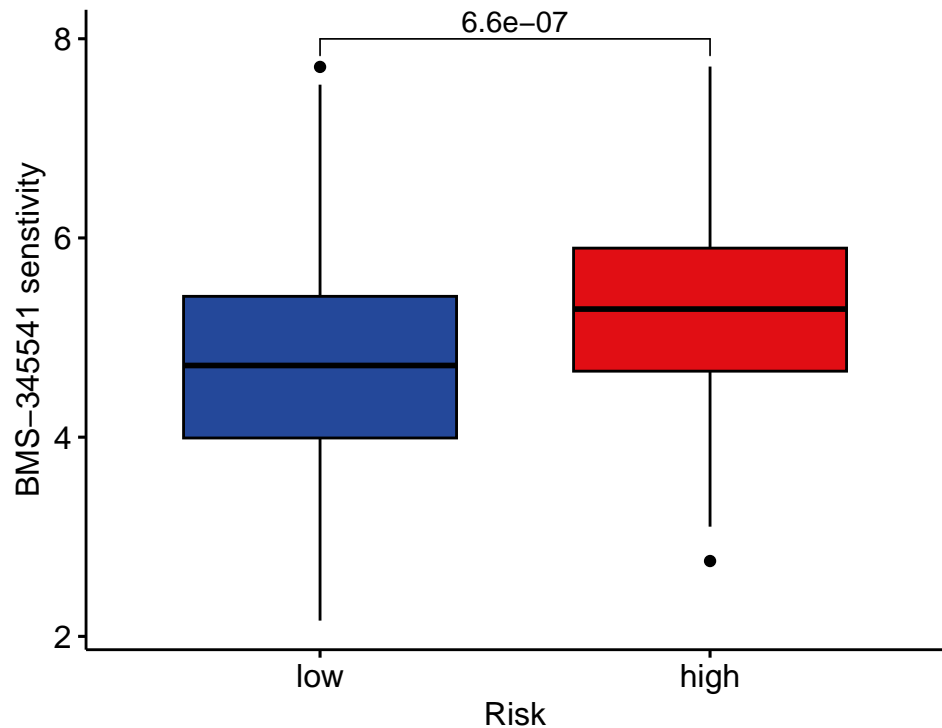

Risk low high

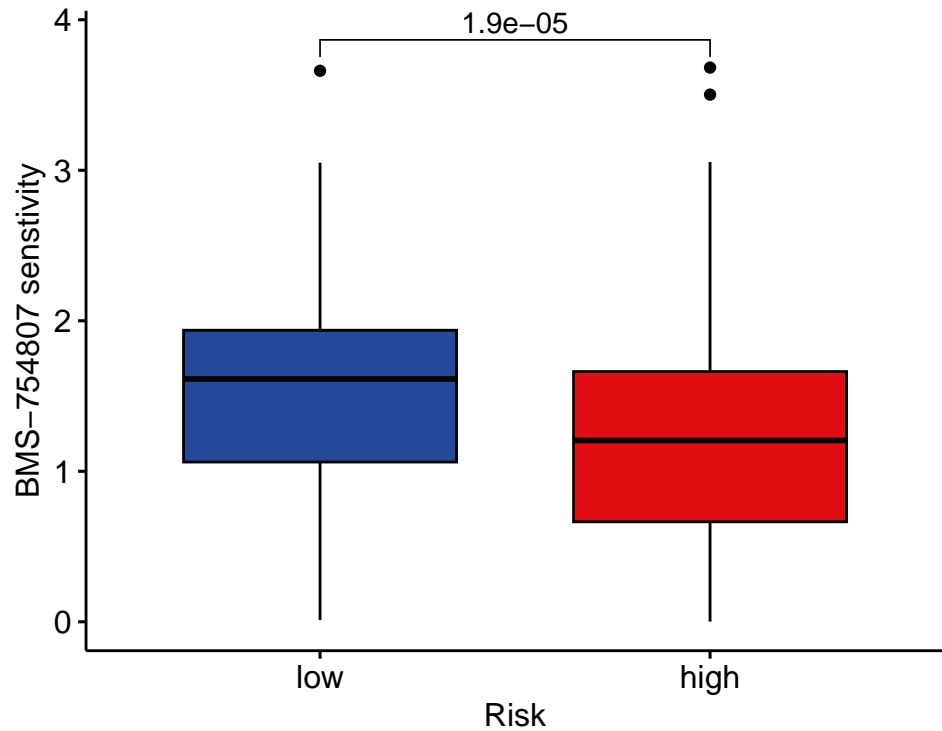

Risk  low  high

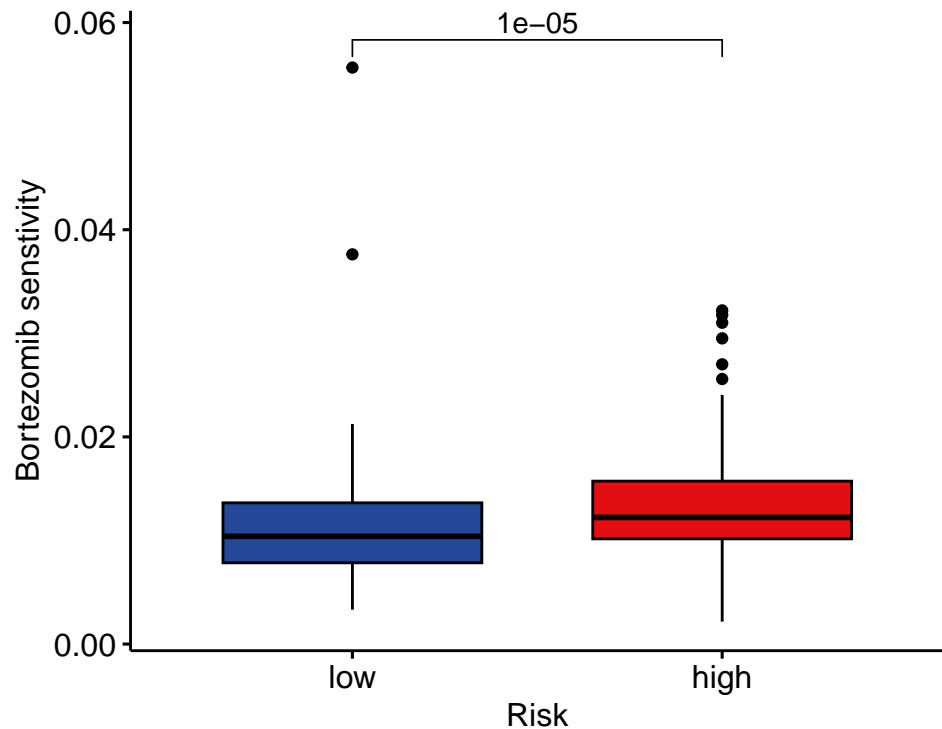

Risk  low  high

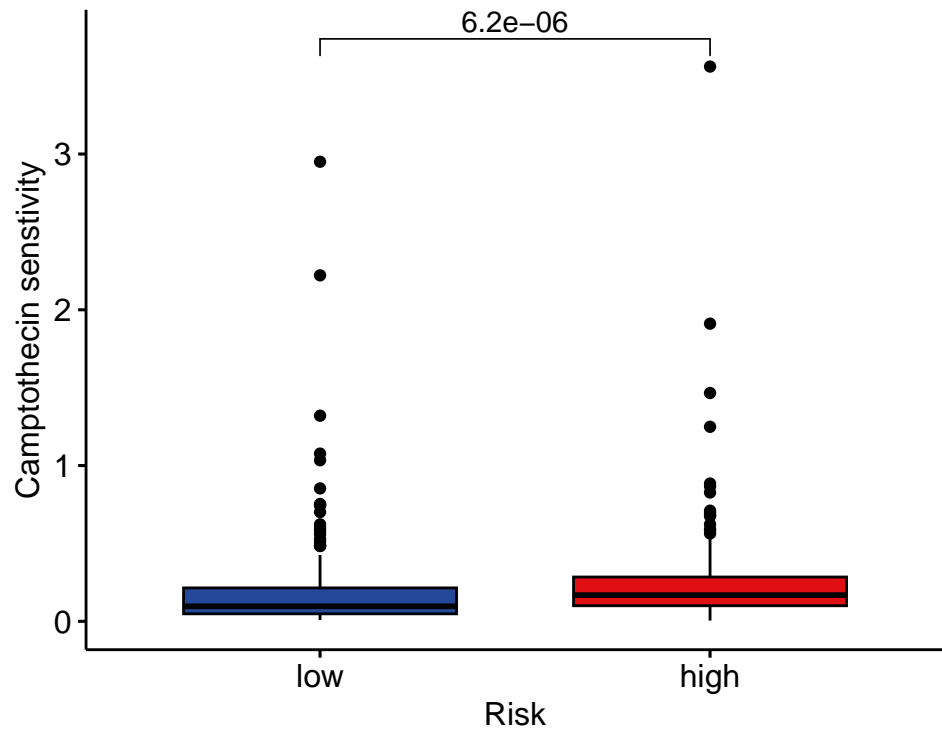

Risk  low  high

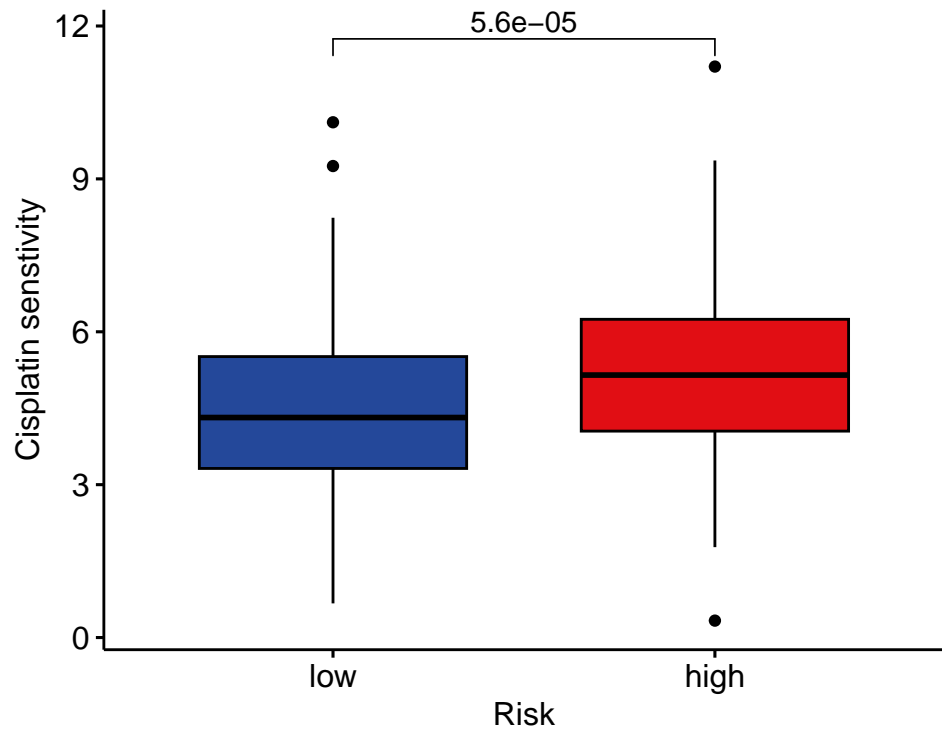

Risk  low  high

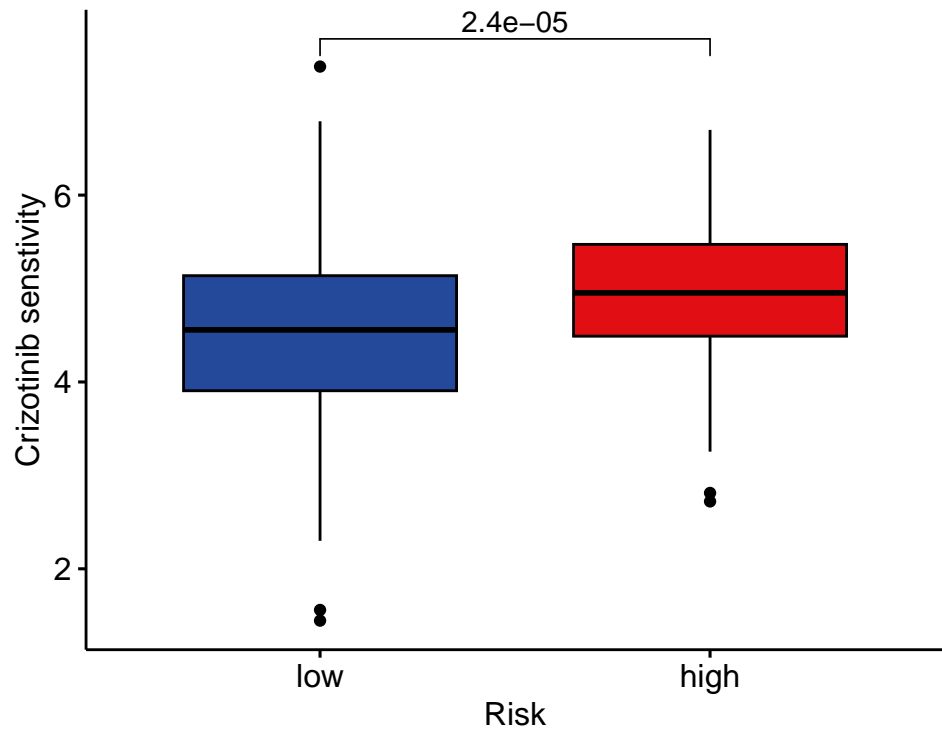



Risk  low  high

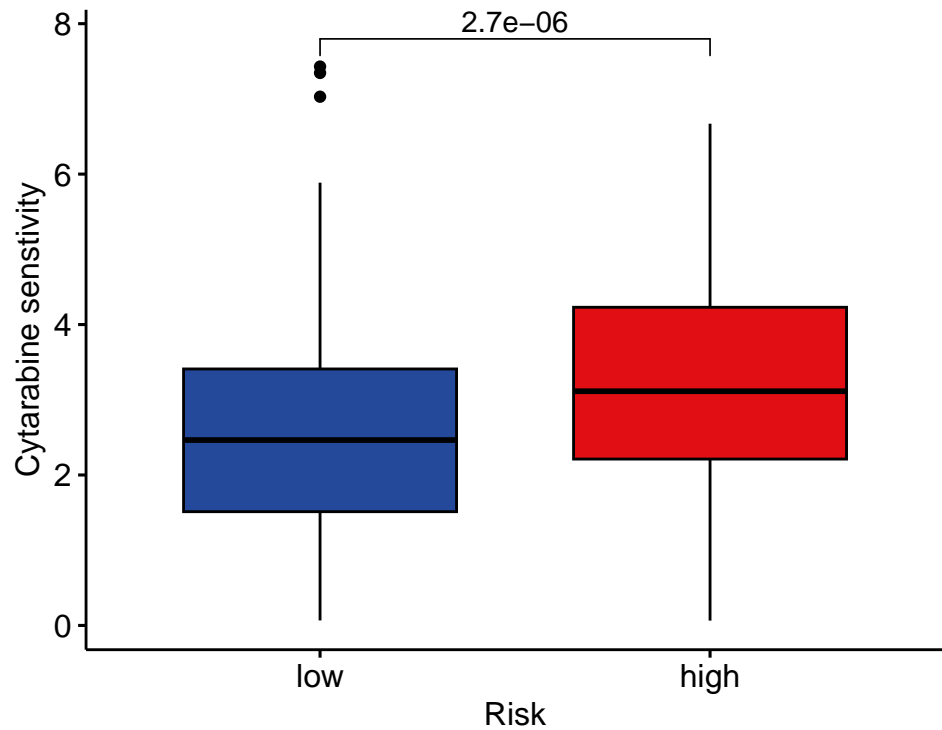

Risk  low  high

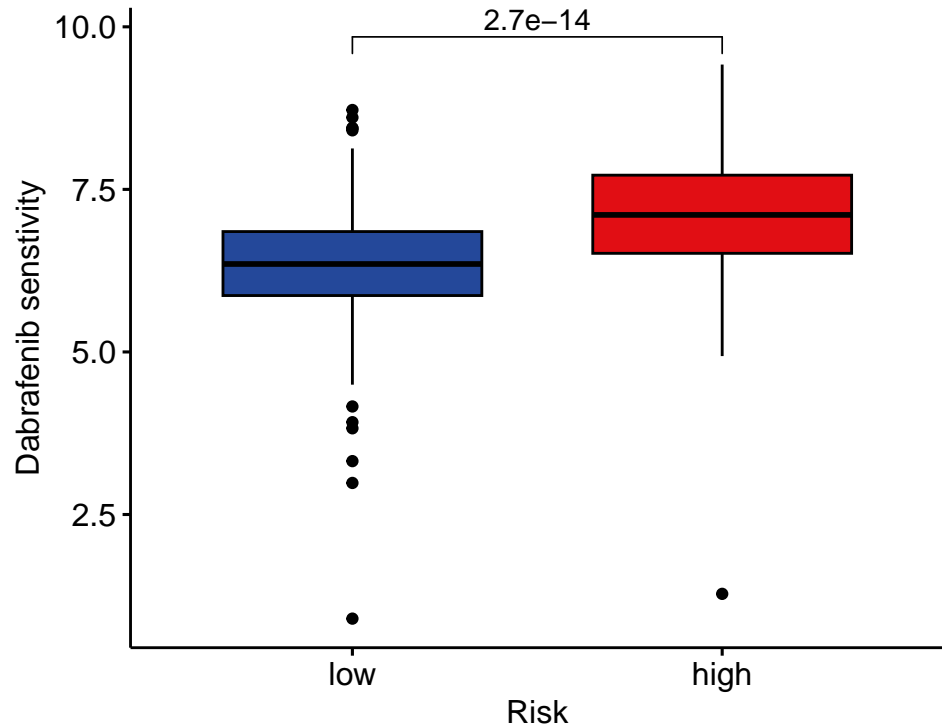

Risk low high

6.1e-05

Dactinomycin sensitivity

1.5

1.0

0.5

0.0

low

high

Risk

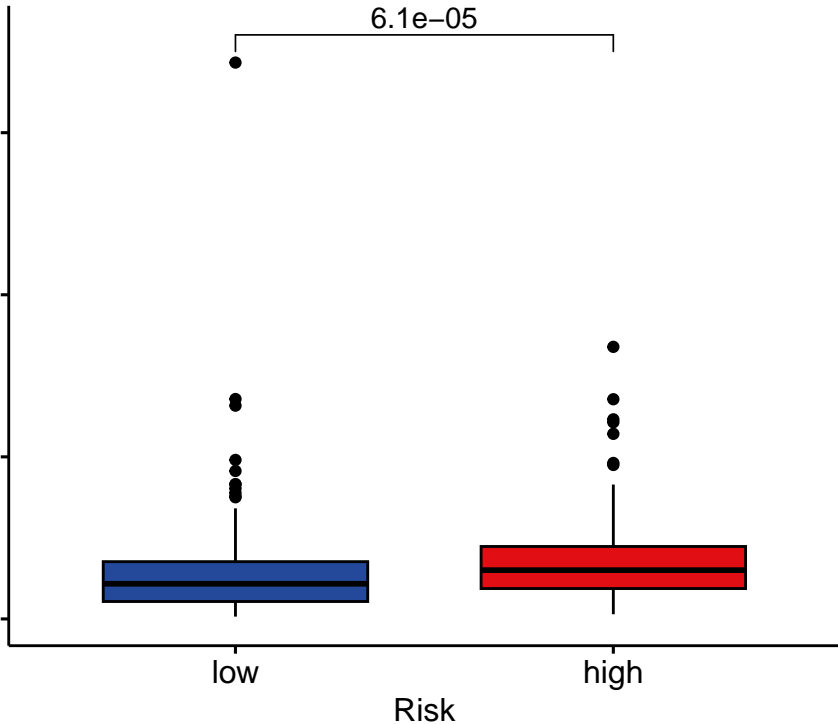

Risk  low  high

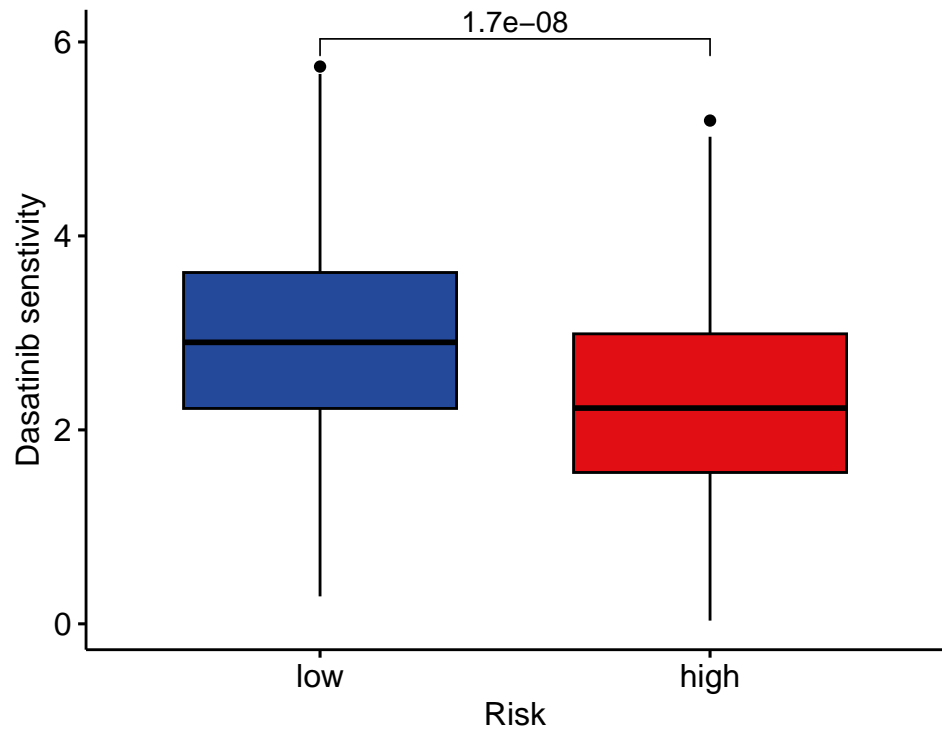

Risk low high

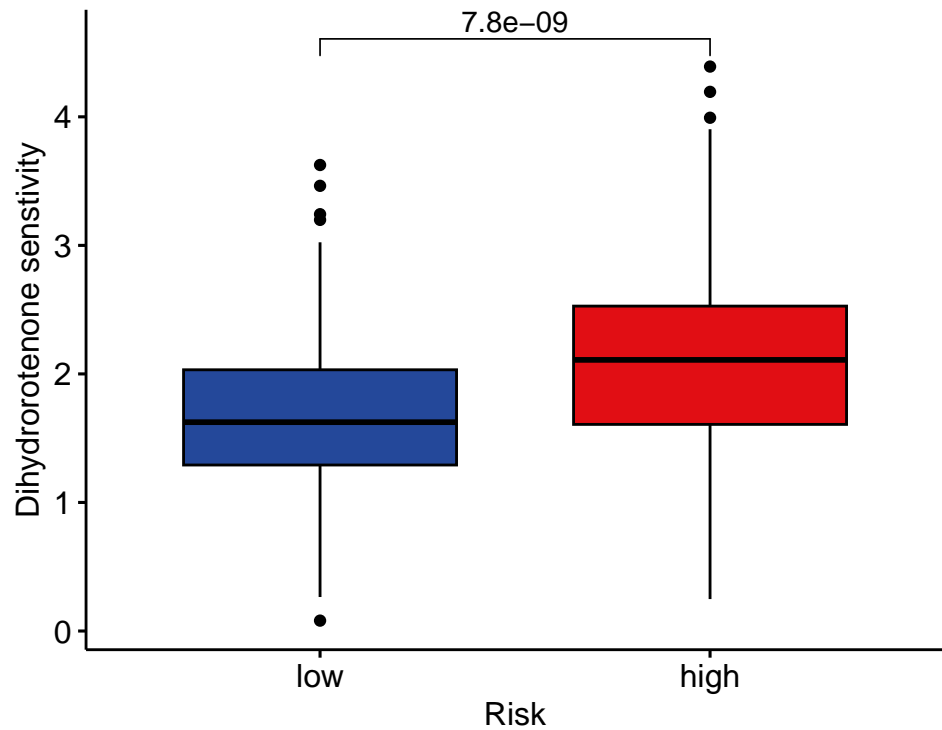

Risk low high

0.00088

Eg5\_9814 sensitivity

4

3

2

1

0

low

high

Risk

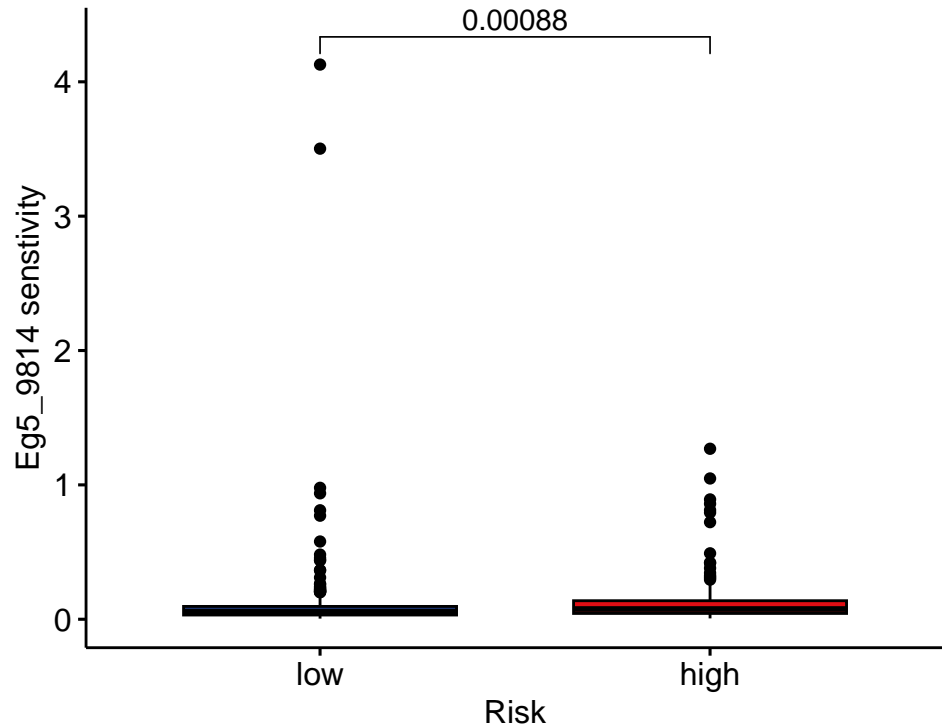

Risk low high

$3.8e-07$

Elephantin sensitivity

10

8

6

4

2

low

high

Risk

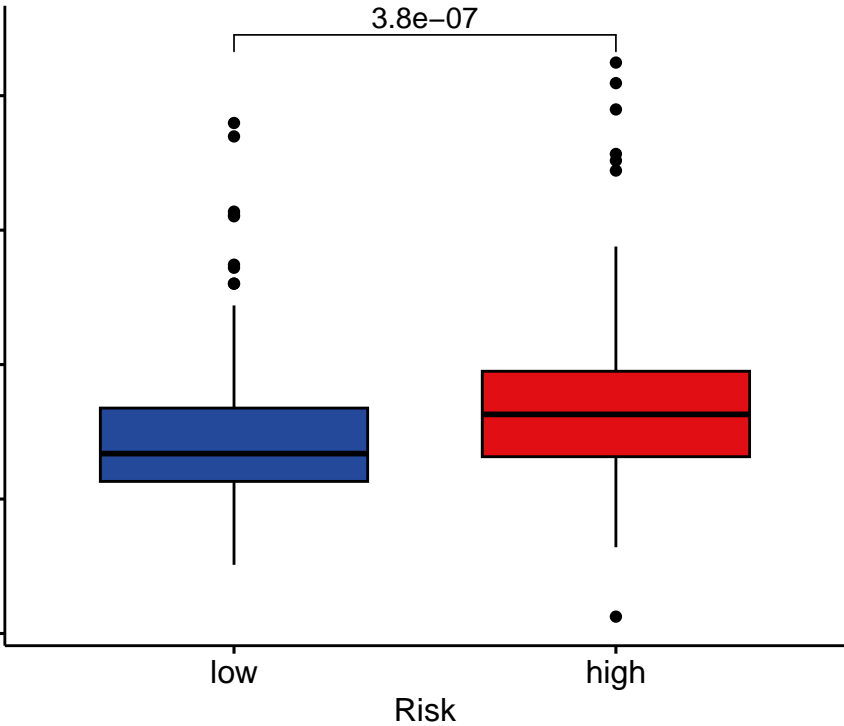

Risk  low  high

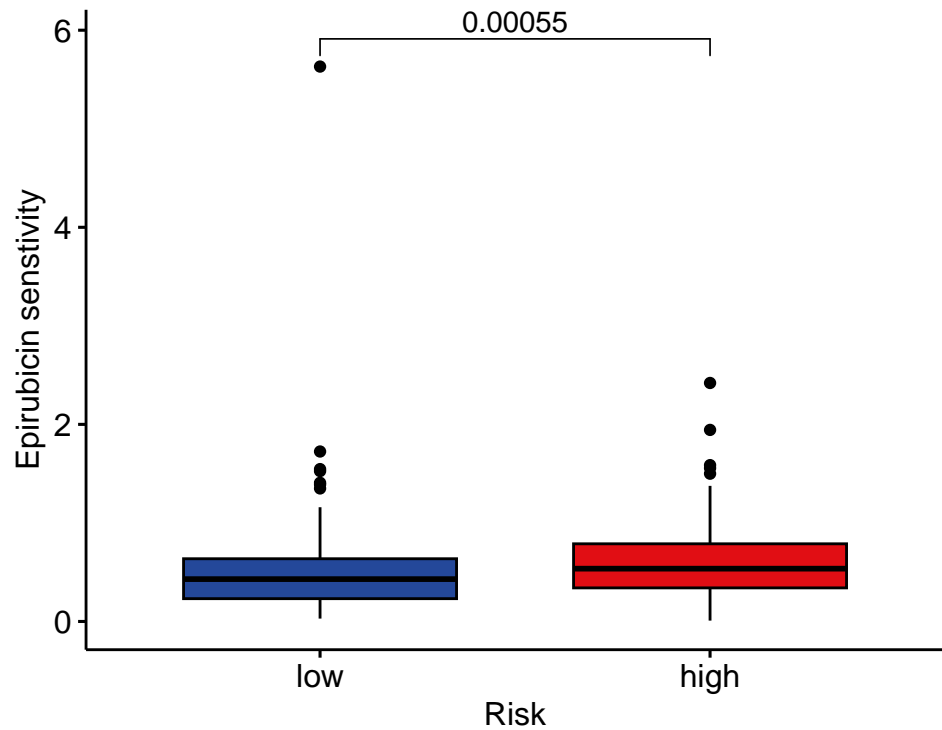



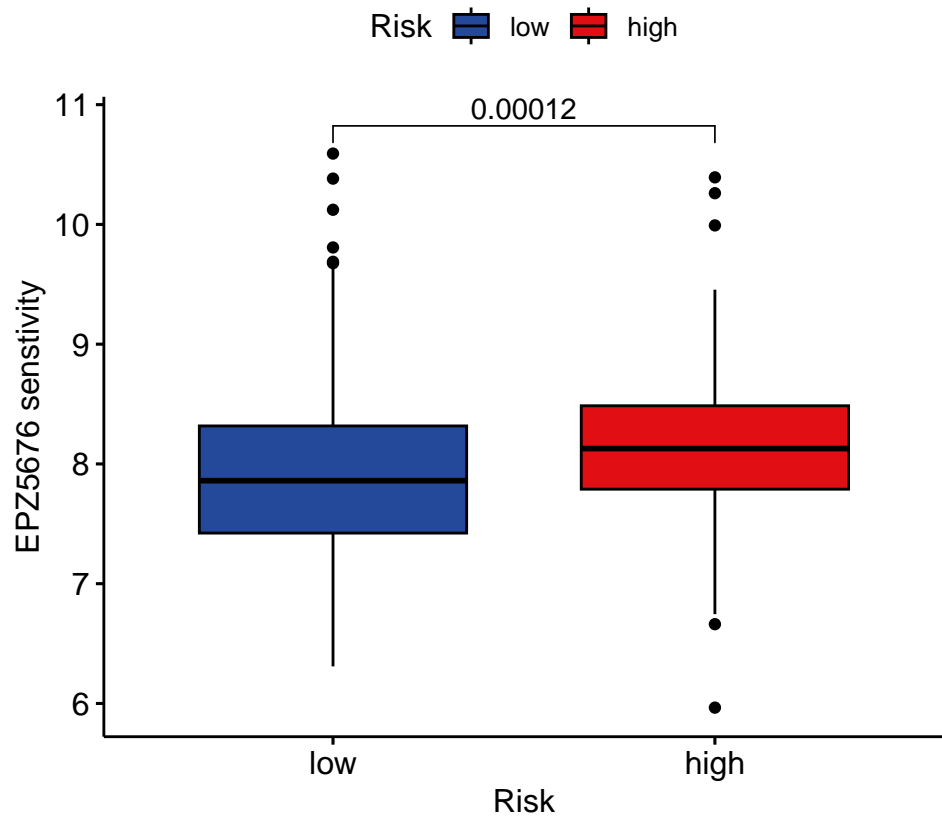

Risk  low  high

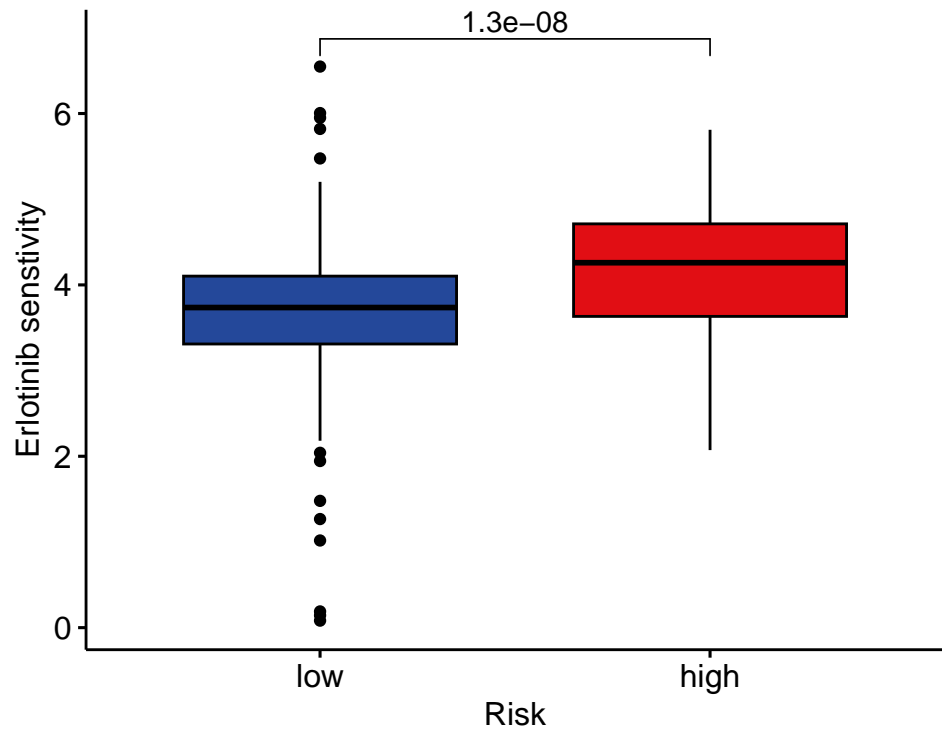

Risk low high

1.1e-09

Gefitinib sensitivity

8

6

4

2

0

low

high

Risk

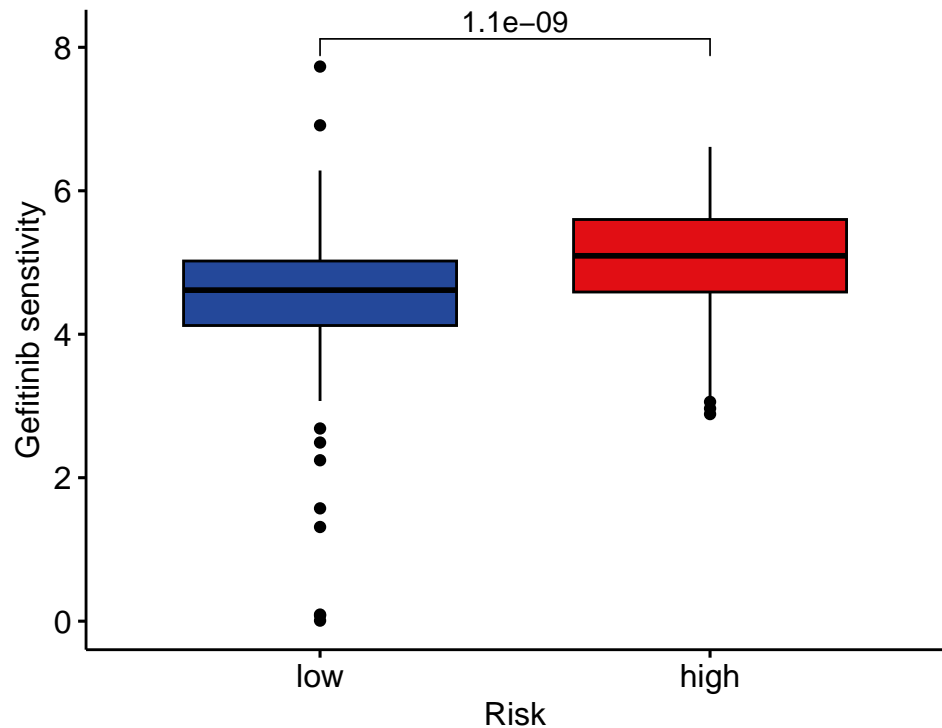

Risk low high

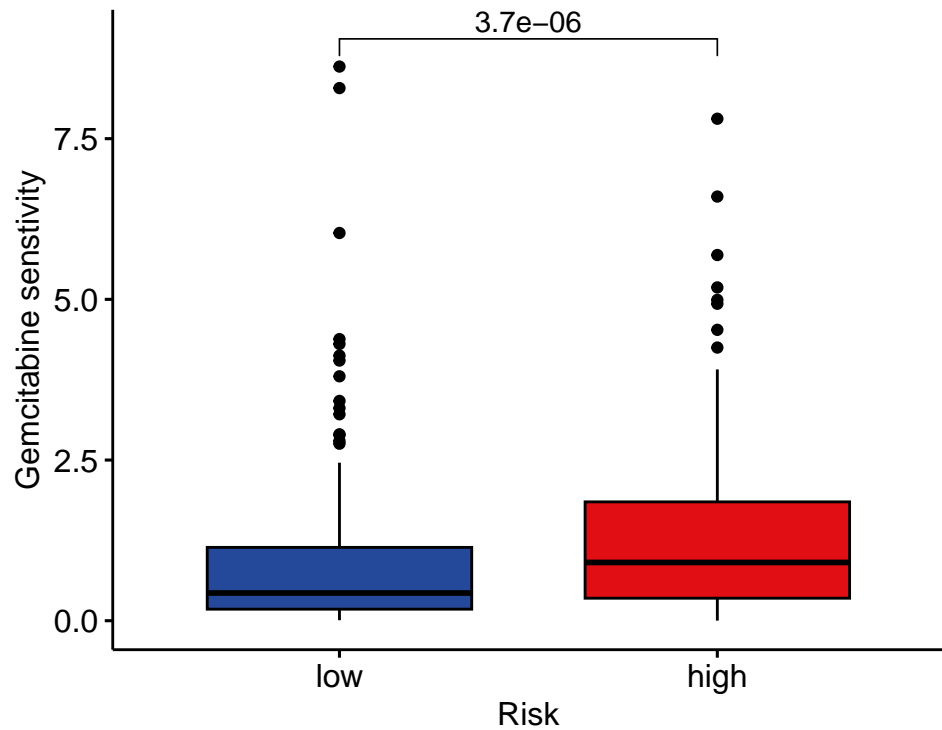

GSK269962A sensitivity

Risk low high

0.00083

low

high

Risk

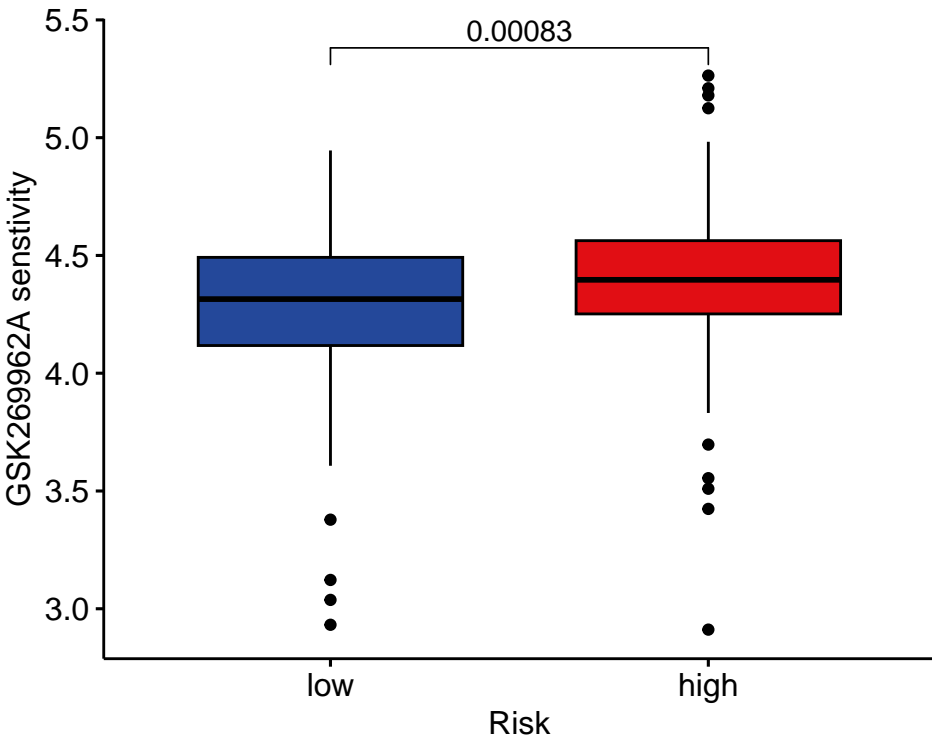

Risk low high

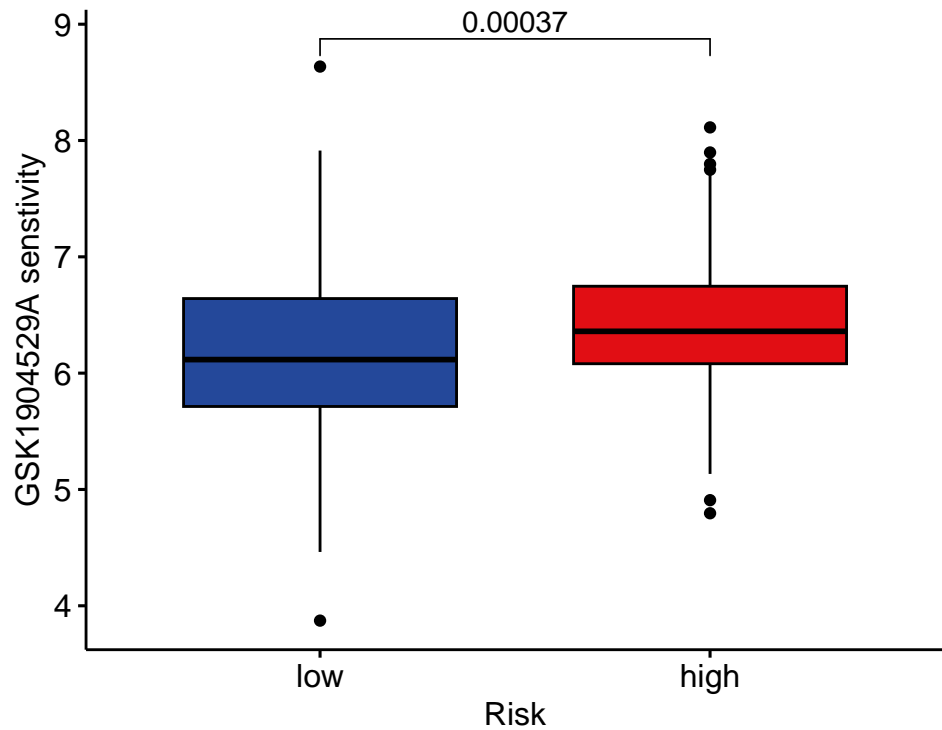

Risk low high

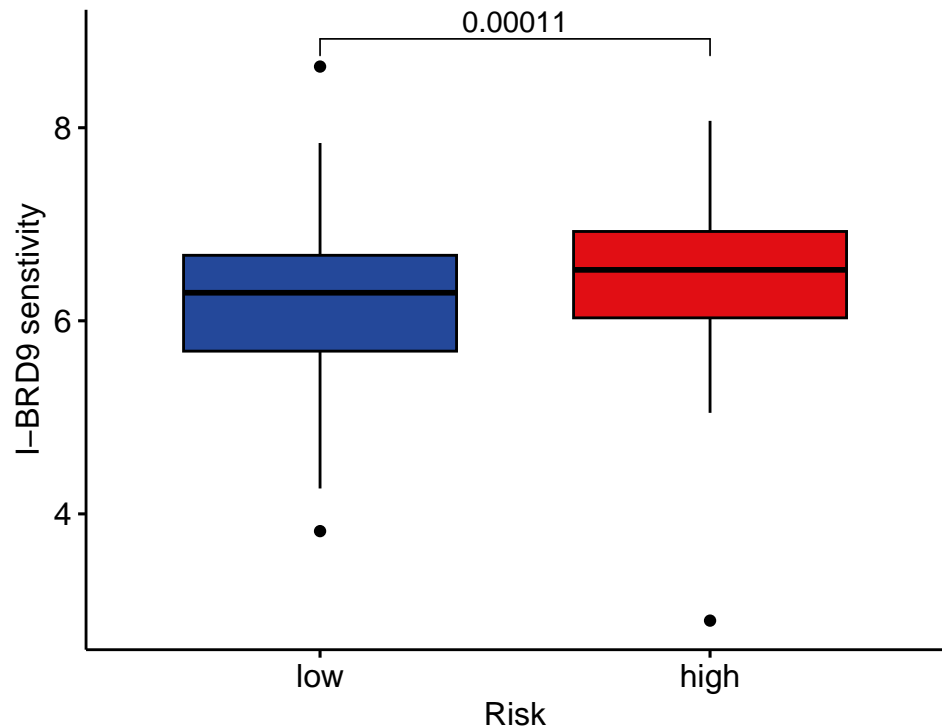

Risk  low  high

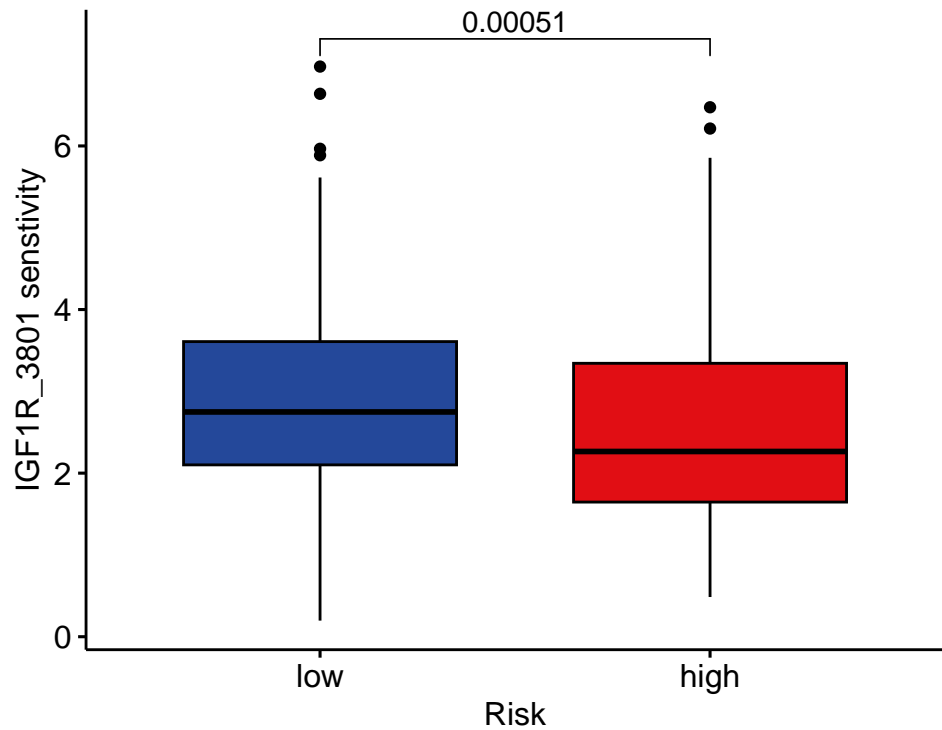



Risk  low  high

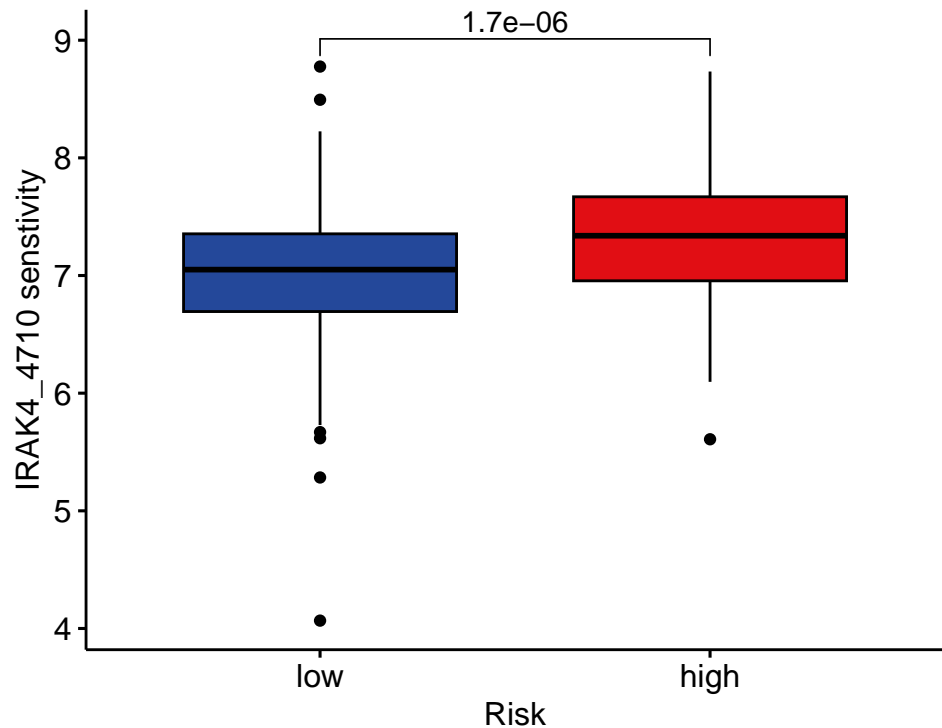

Risk  low  high

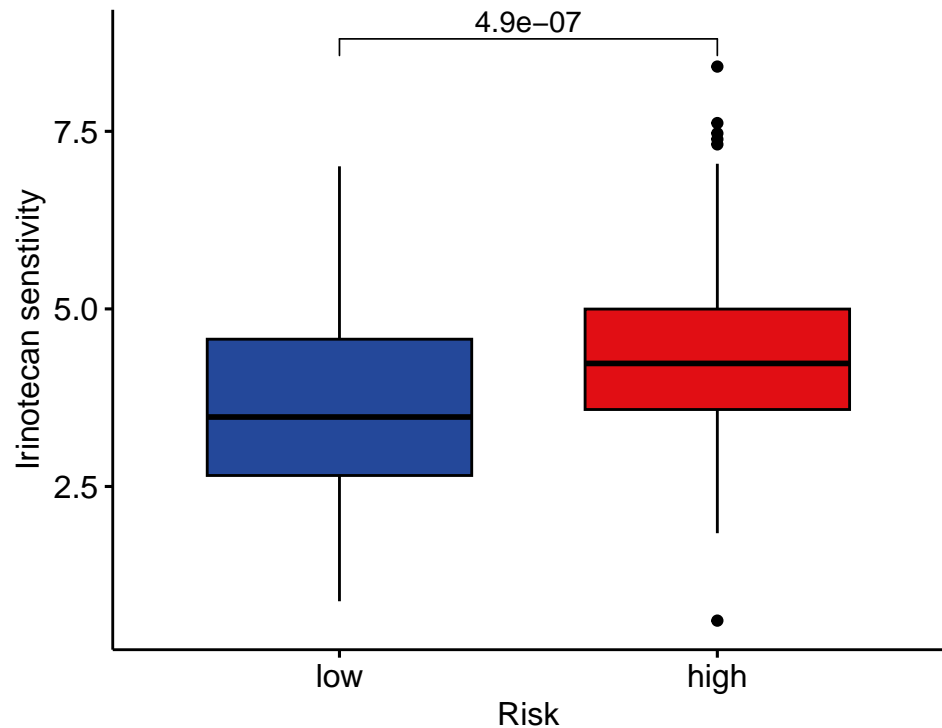

Risk  low  high

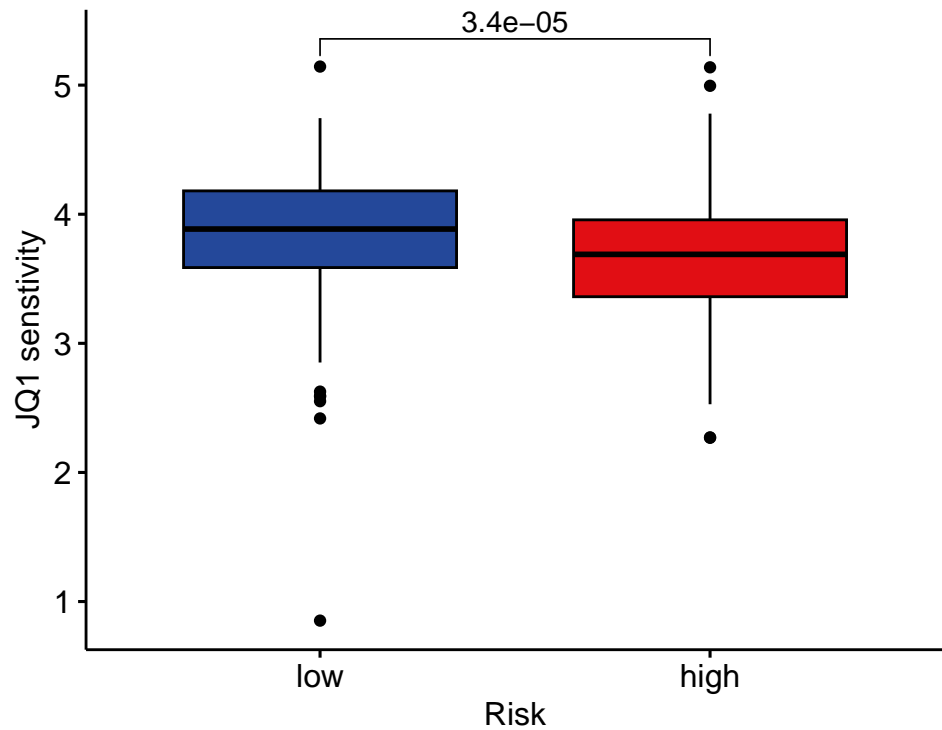

Risk low high

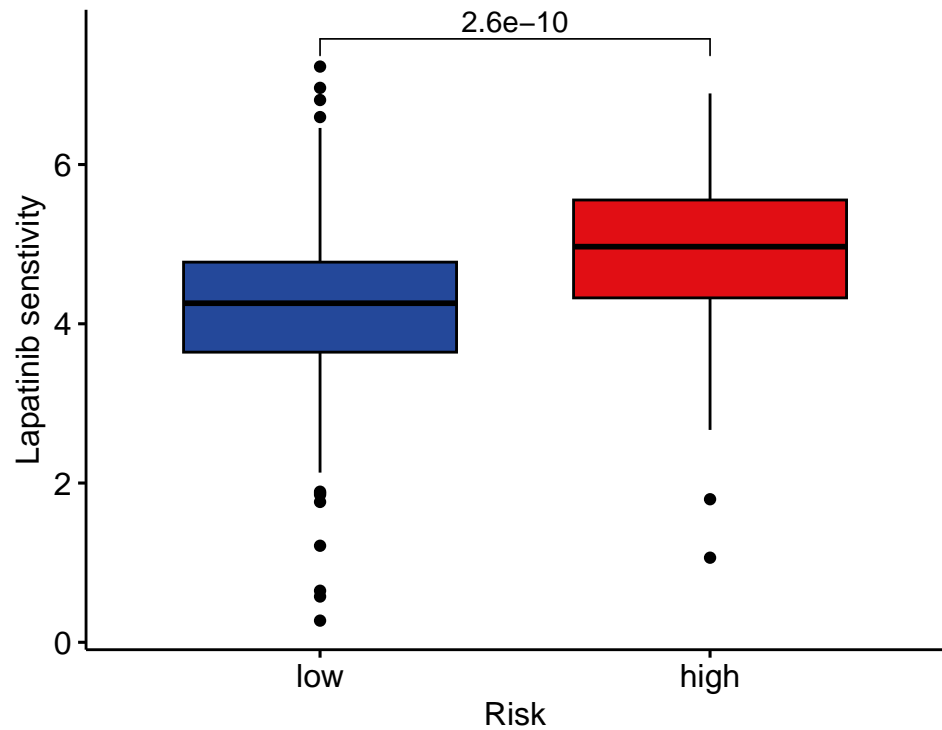

Risk  low  high

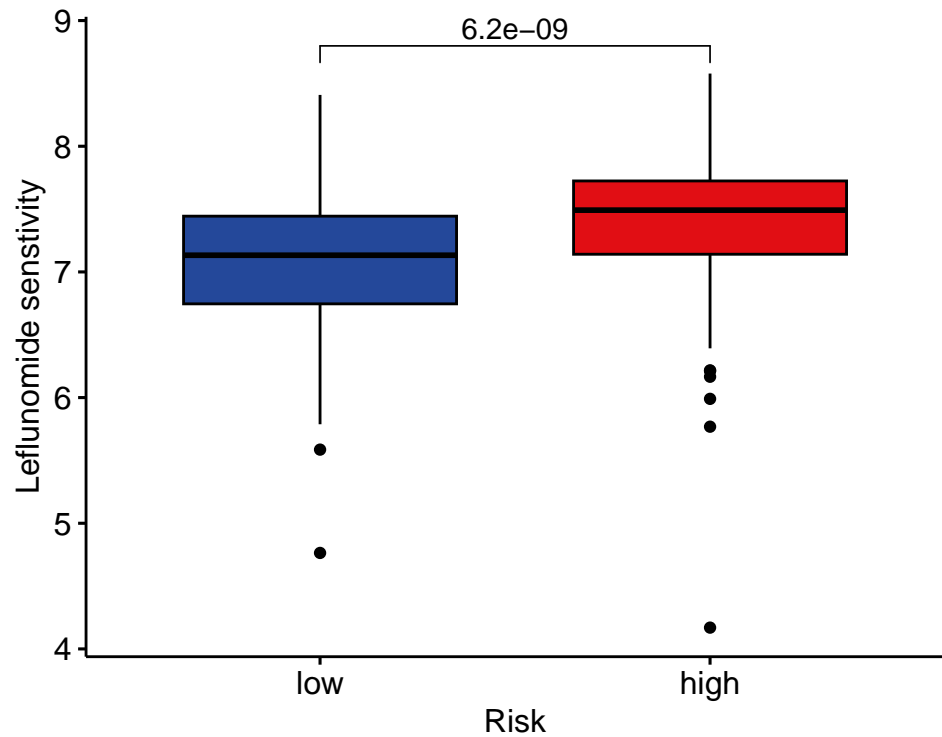

LGK974 sensitivity

Risk low high

$7.4e-09$

low

high

Risk

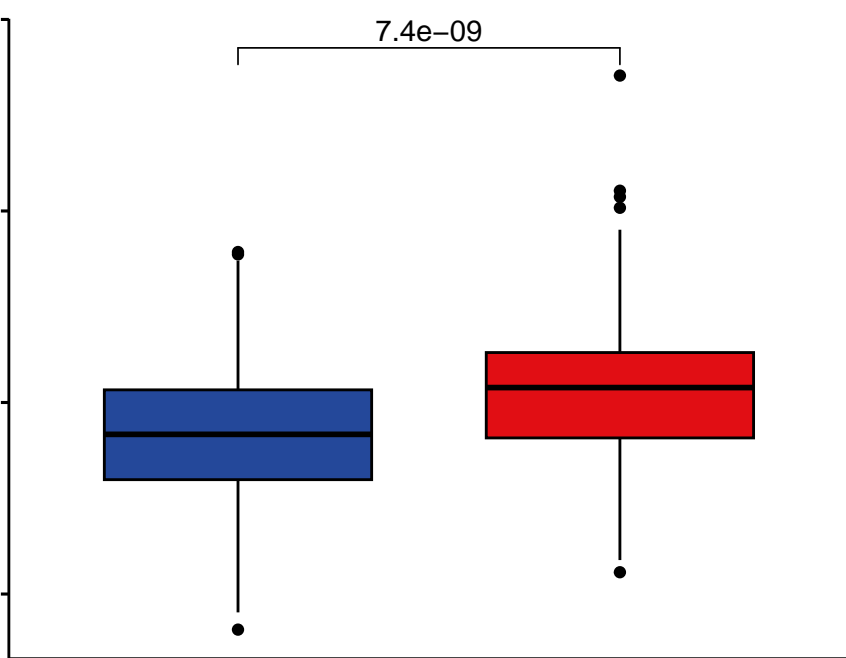

Risk low high

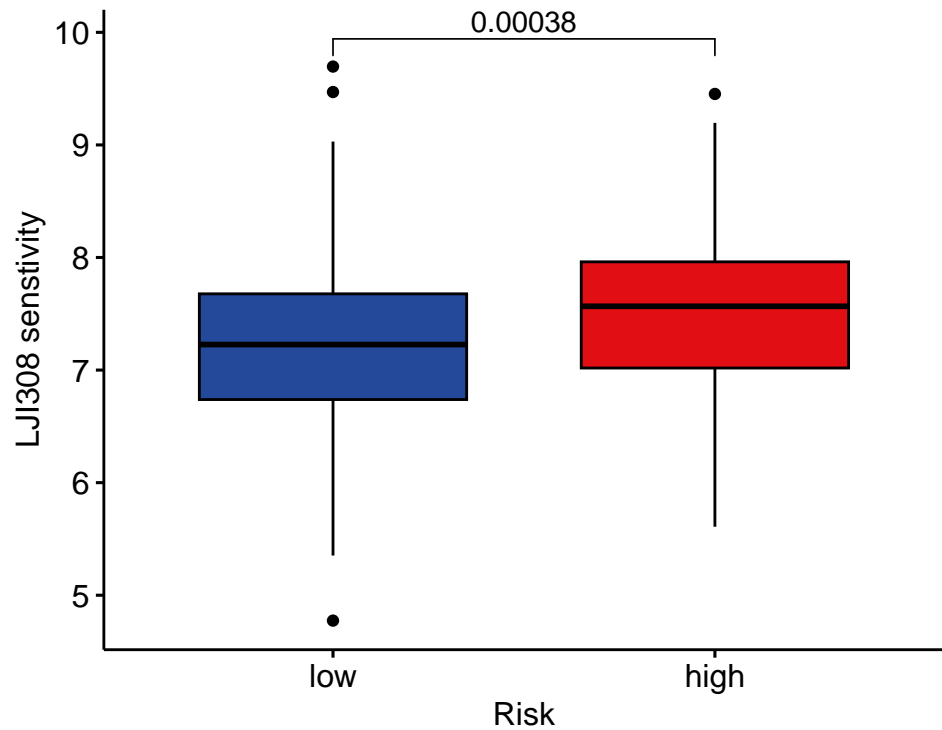

Risk  low  high

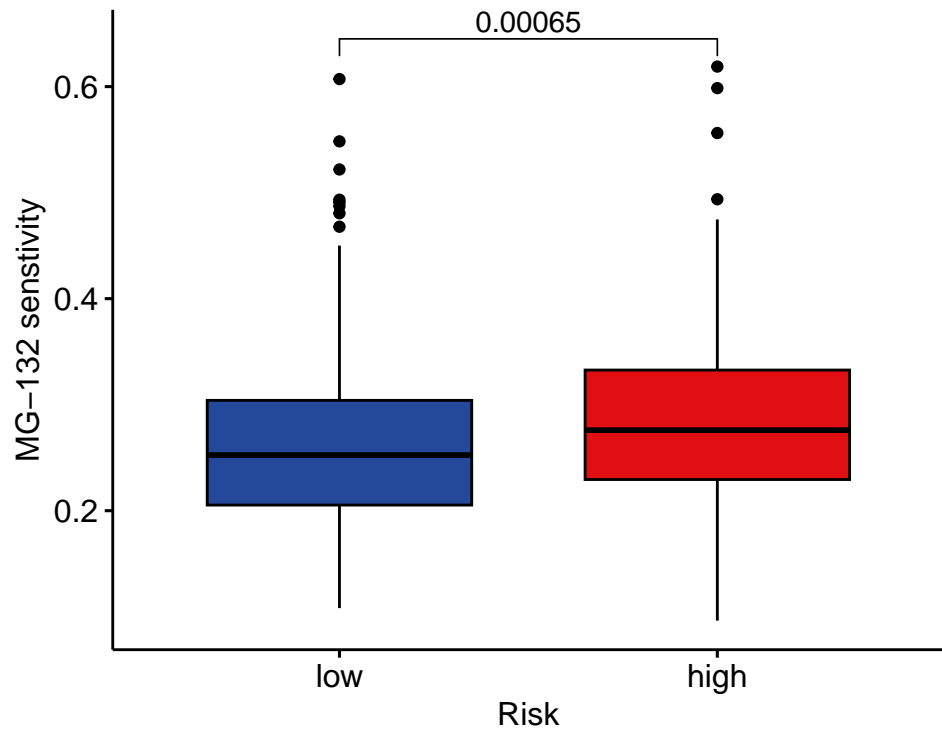



Risk  low  high

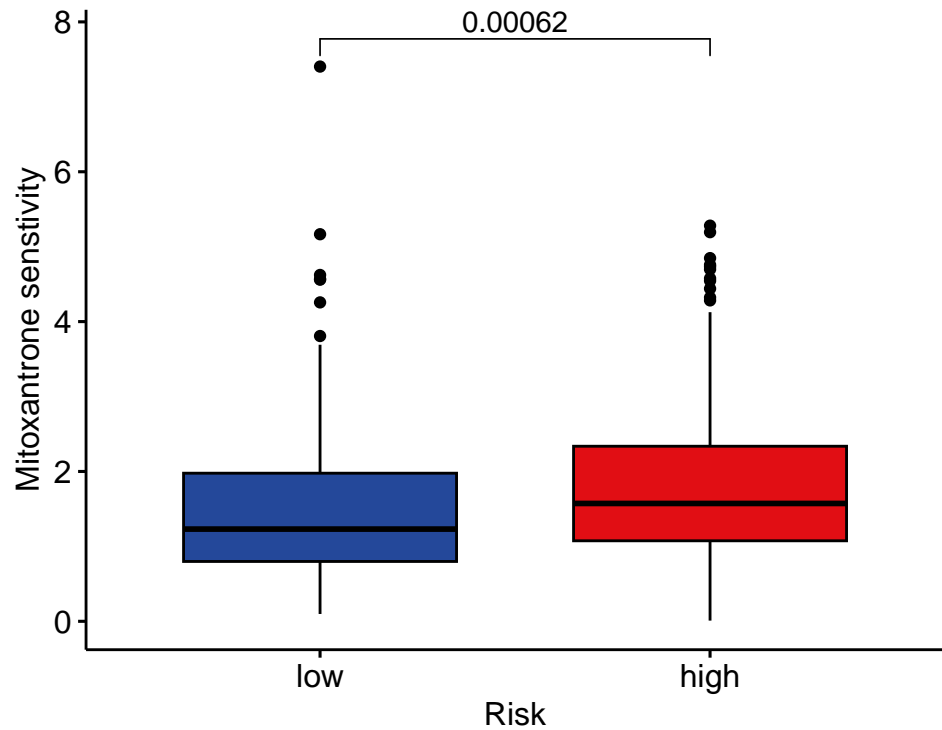

Risk  low  high

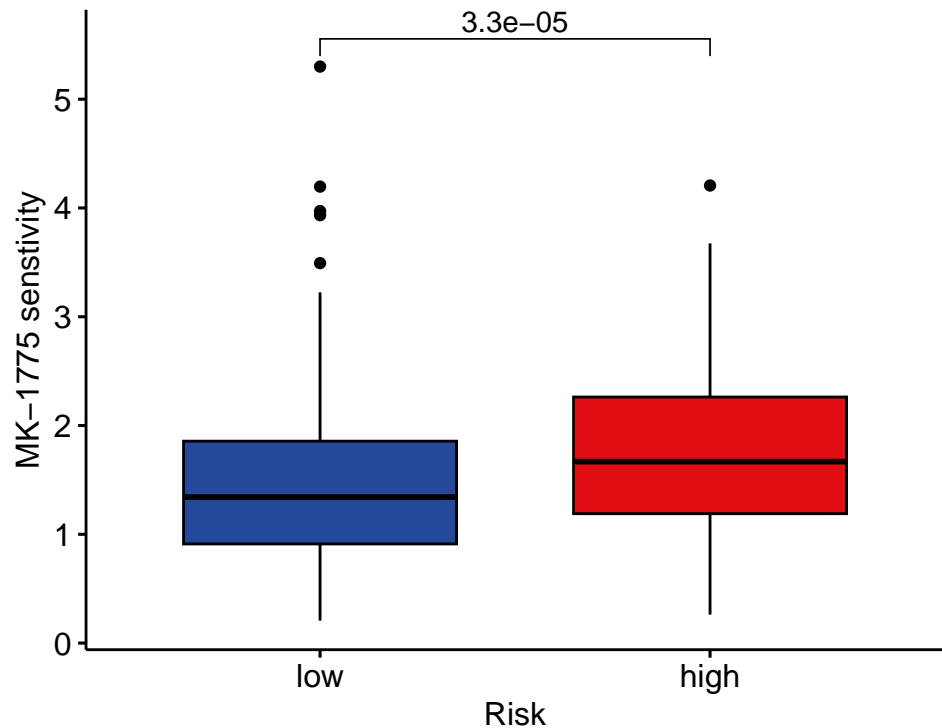

Risk  low  high

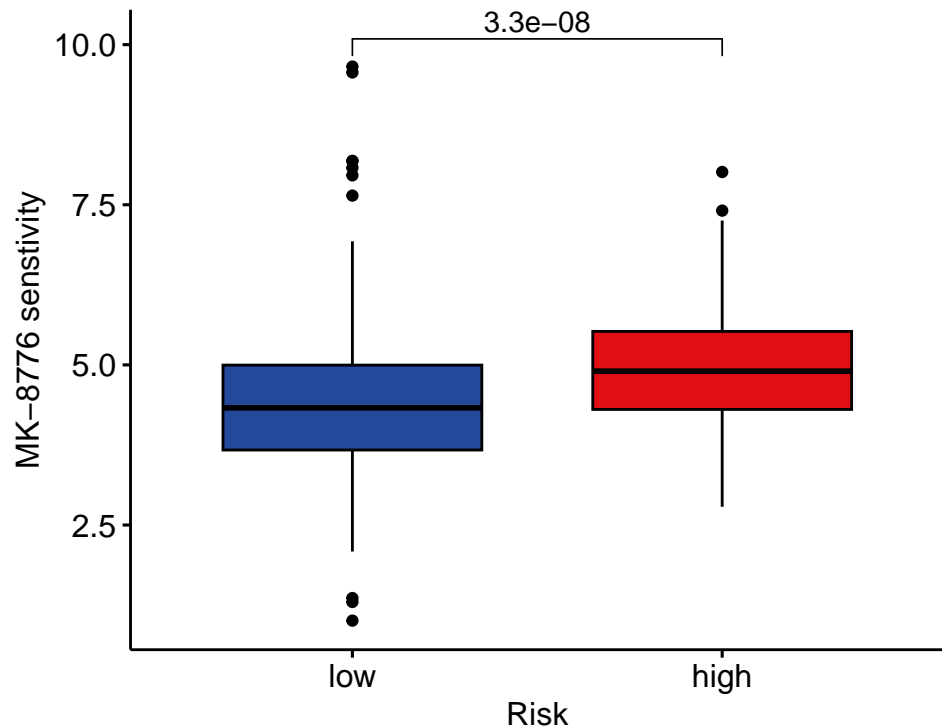

Risk  low  high

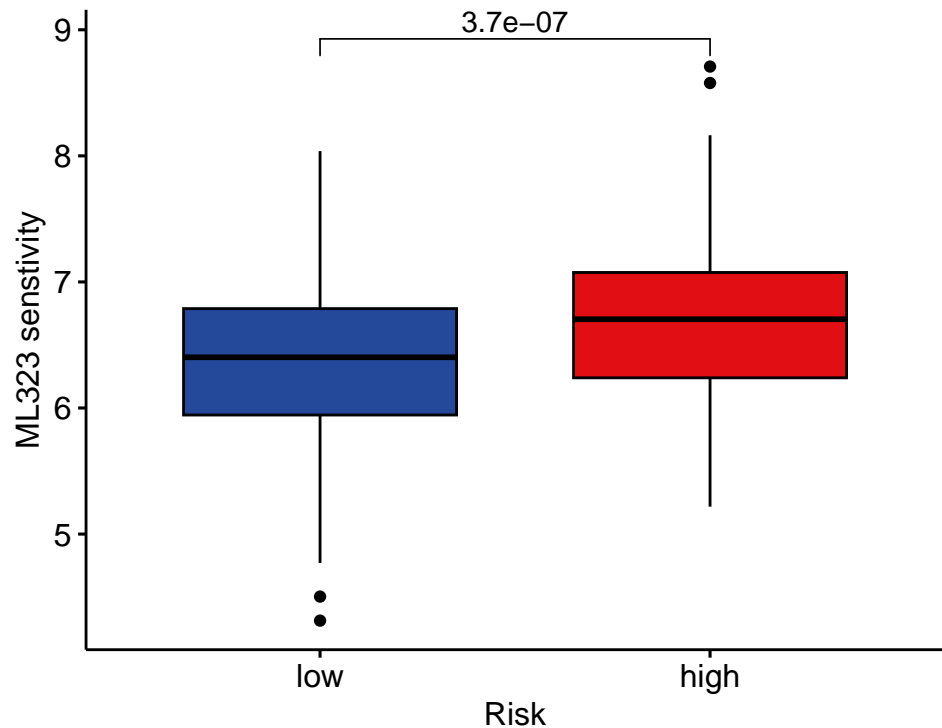

Risk low high

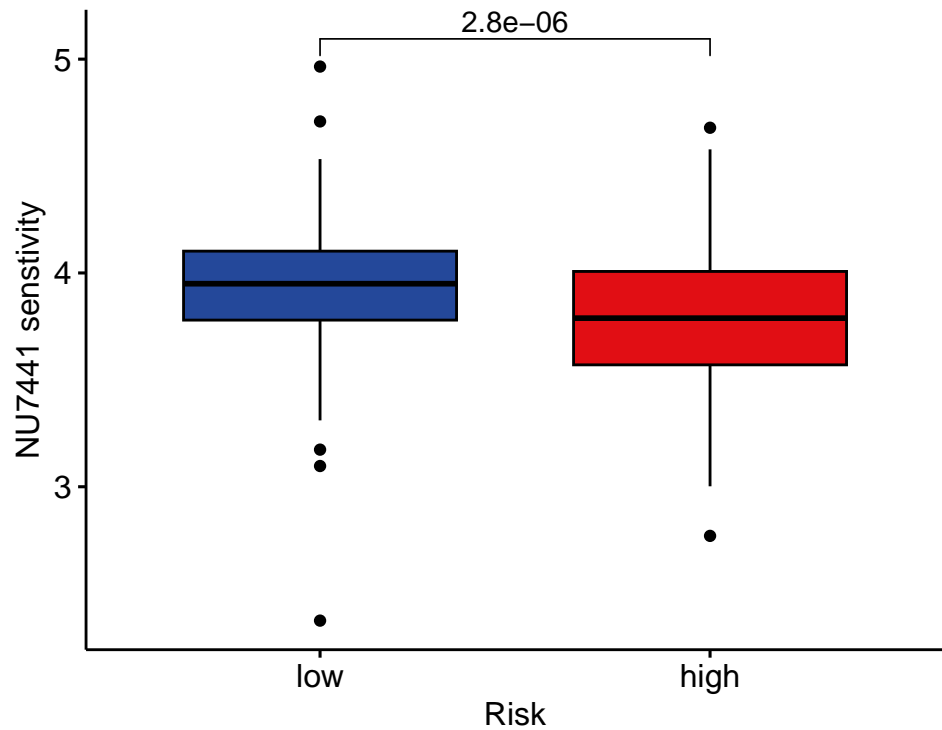

Risk  low  high

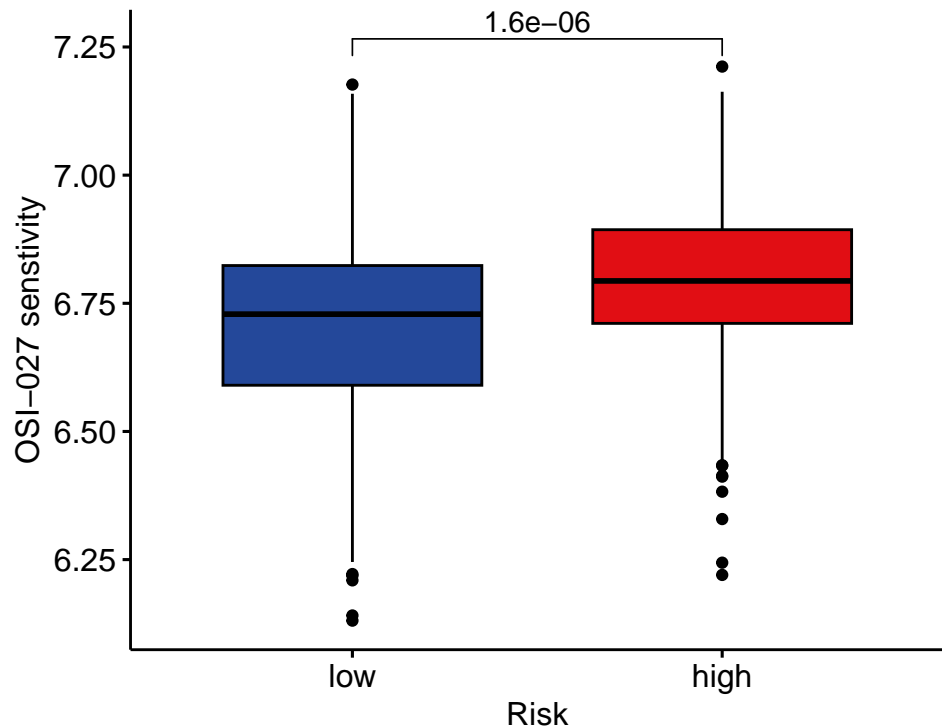

Risk low high

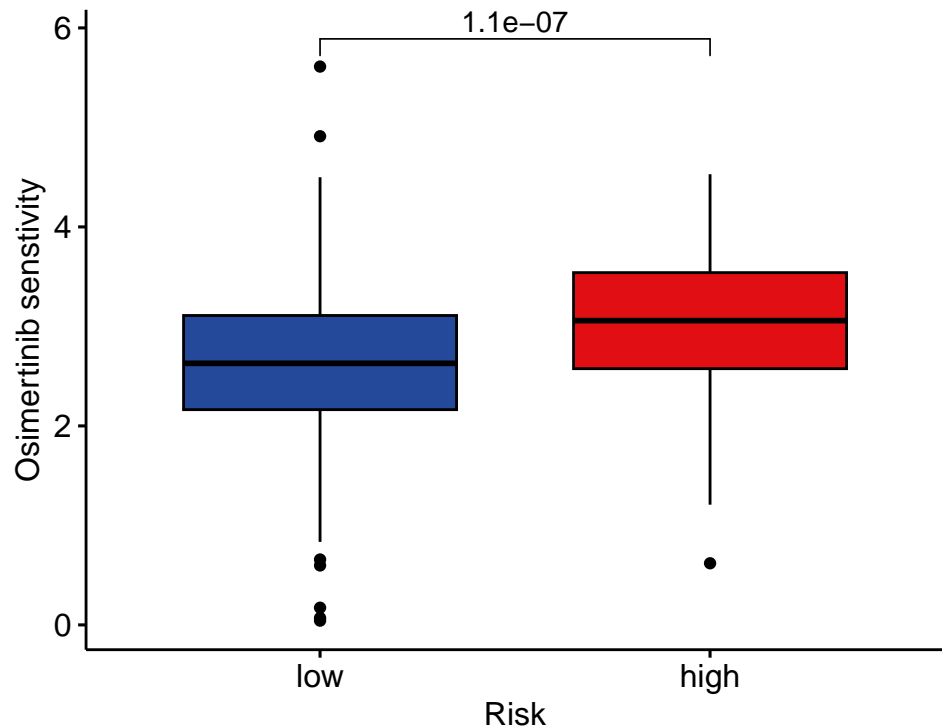

Risk  low  high

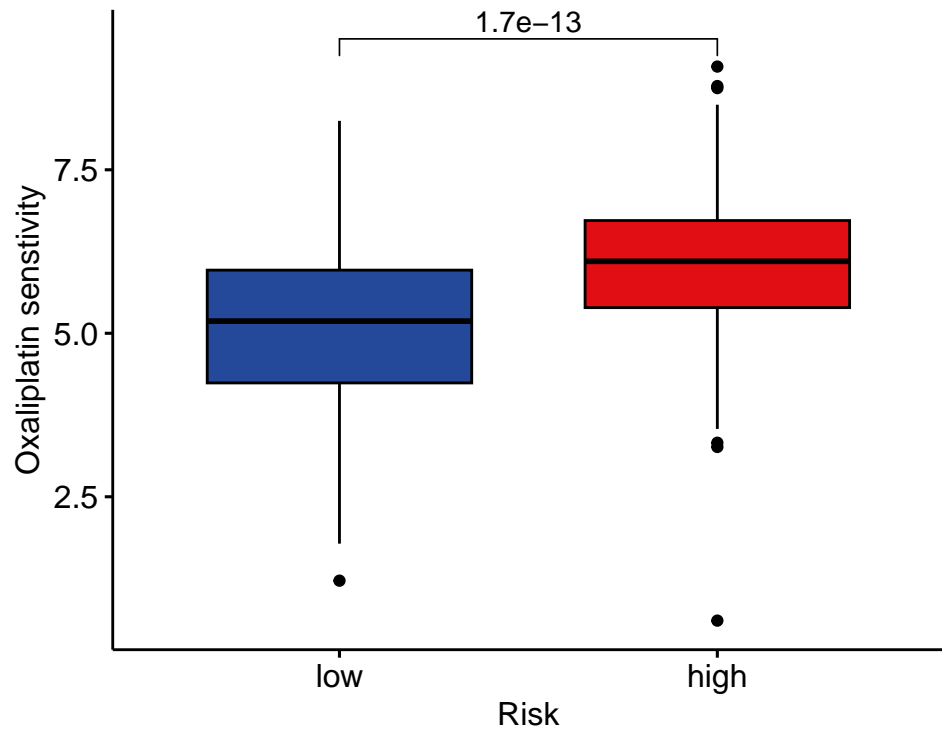



Risk  low  high

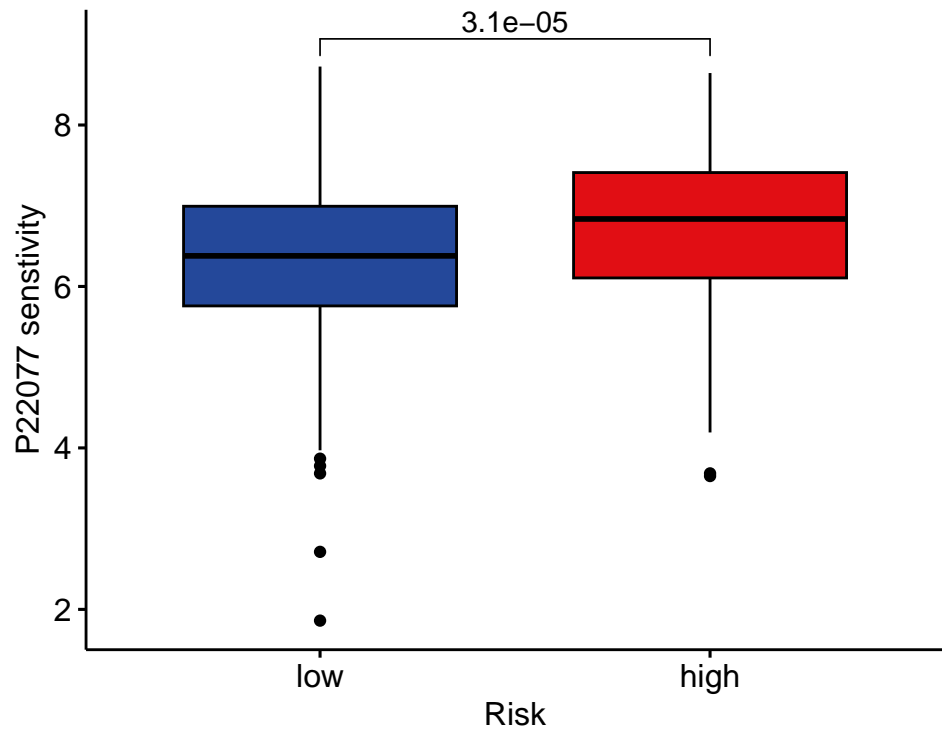

Risk  low  high

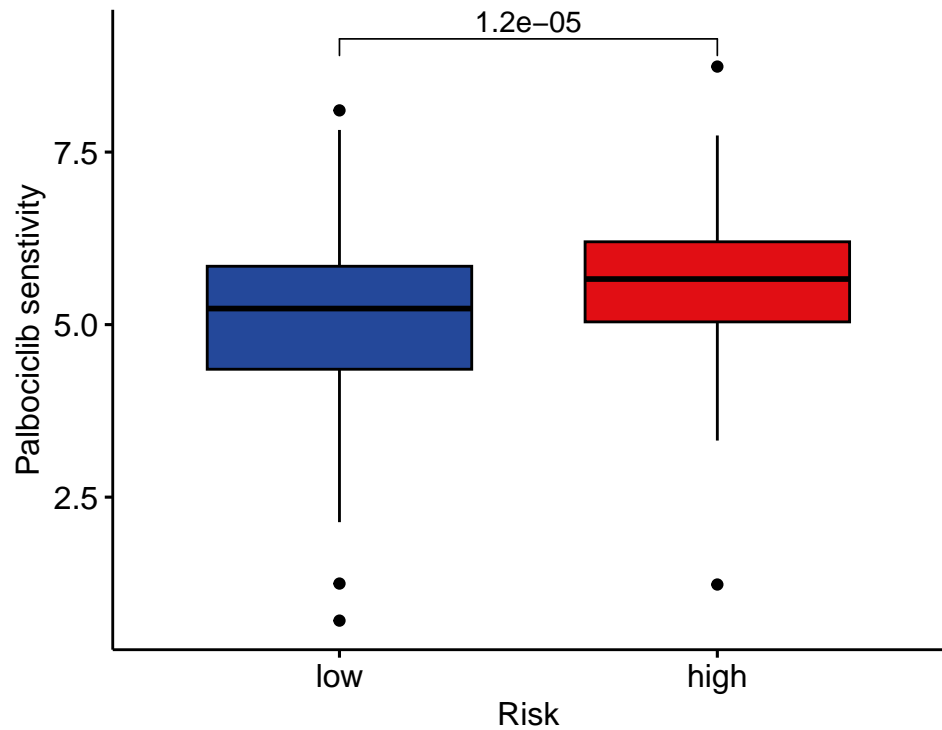

Risk low high

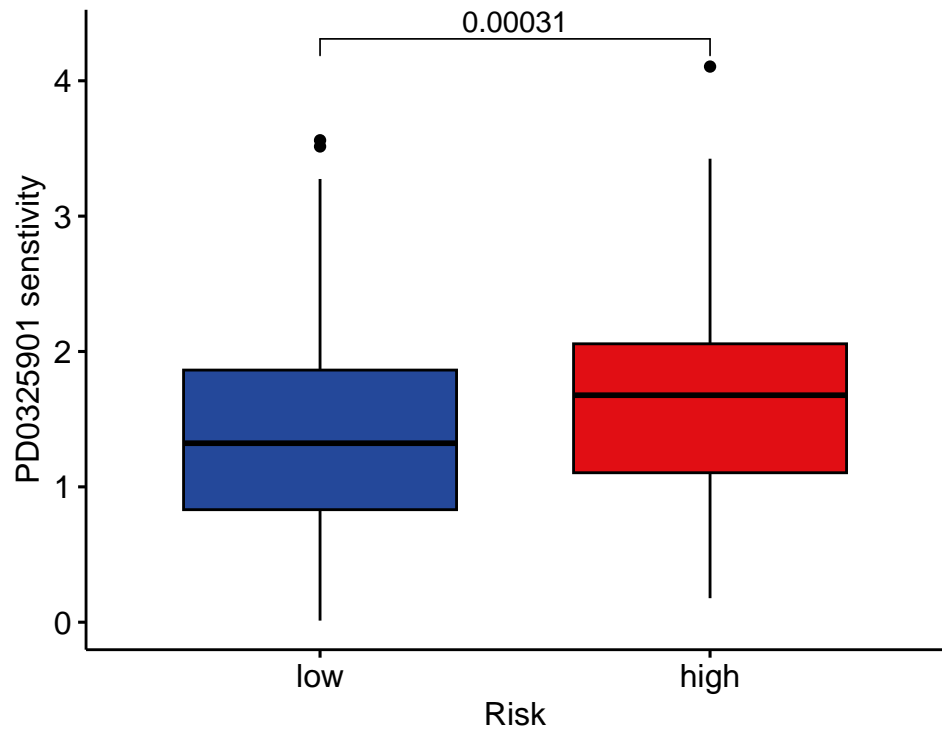

Risk  low  high

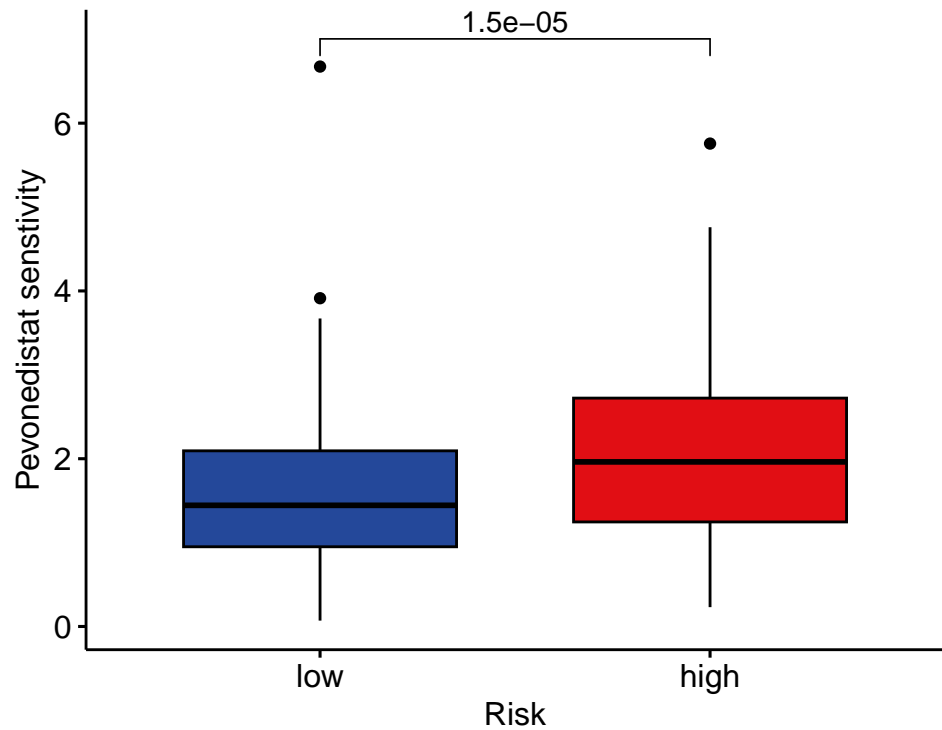

Risk  low  high

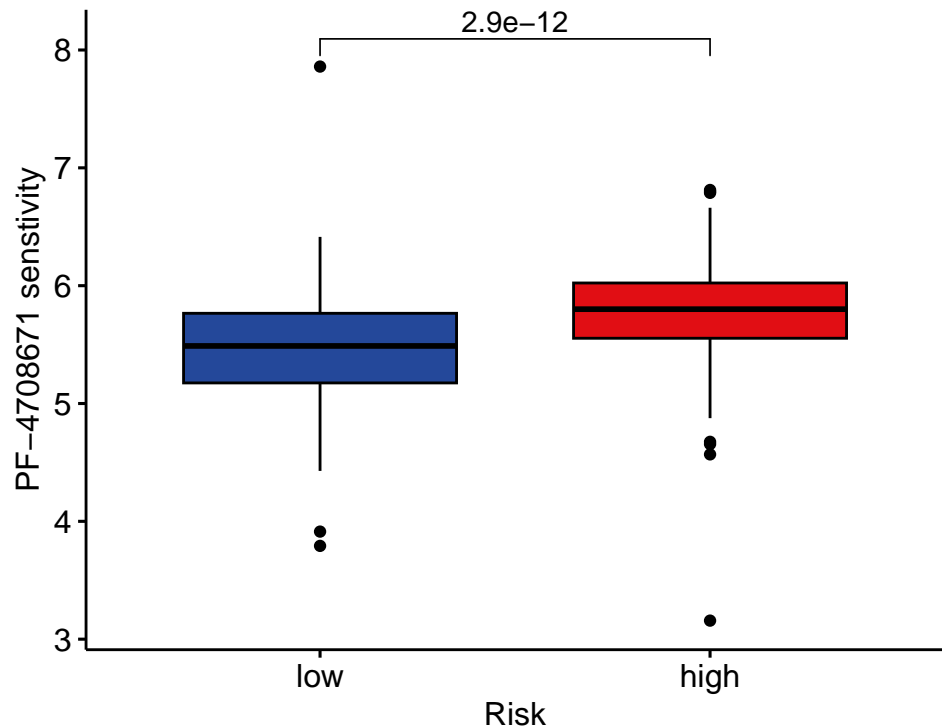

Risk  low  high

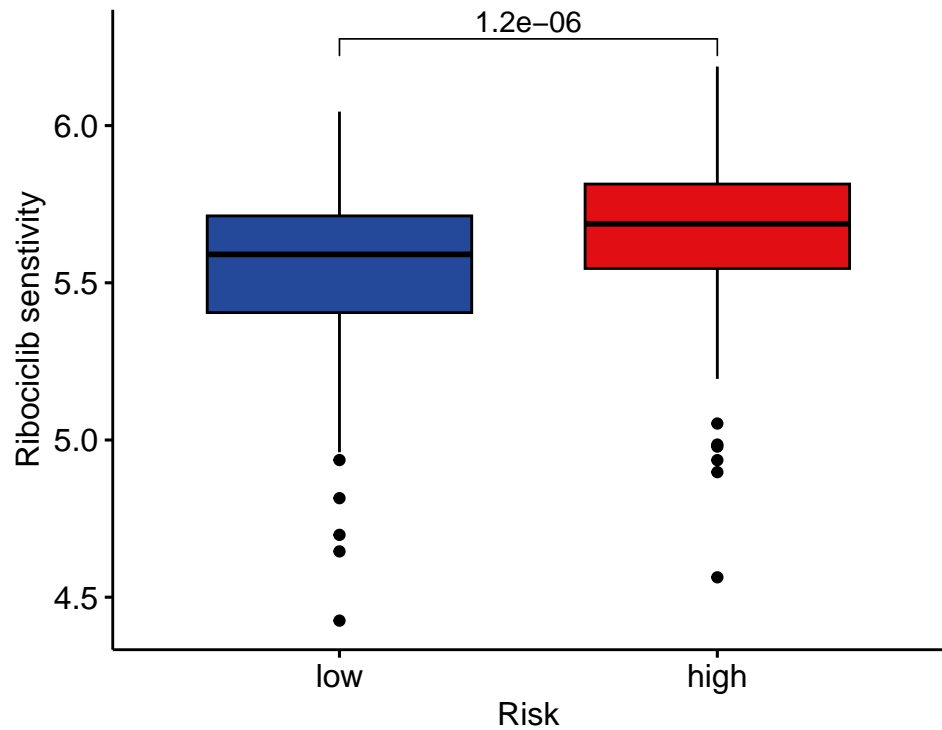

Risk  low  high

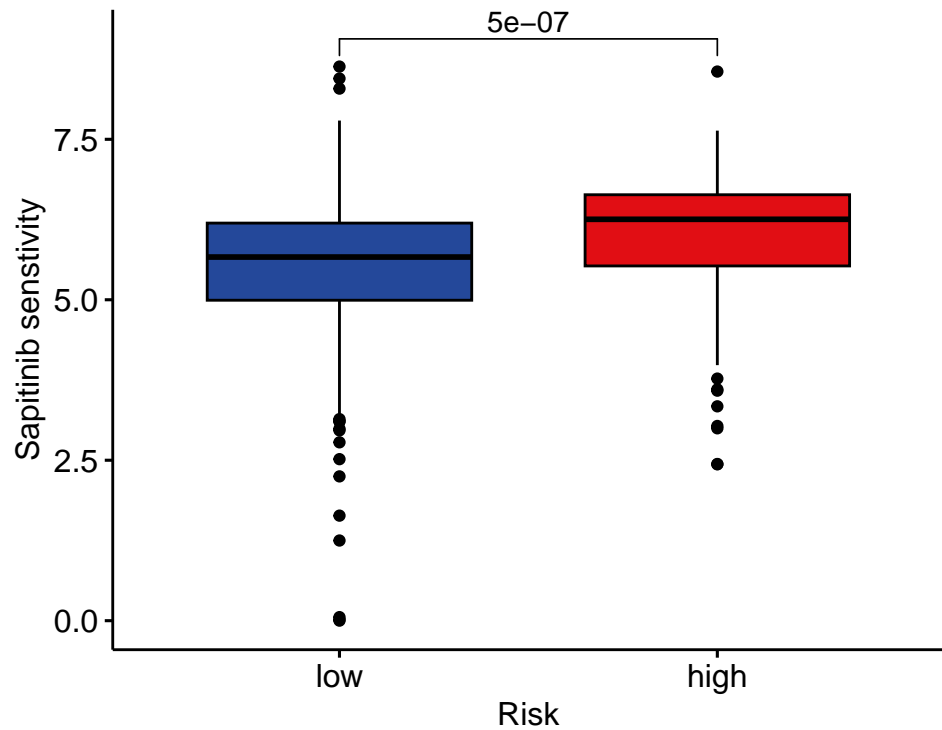

Risk low high

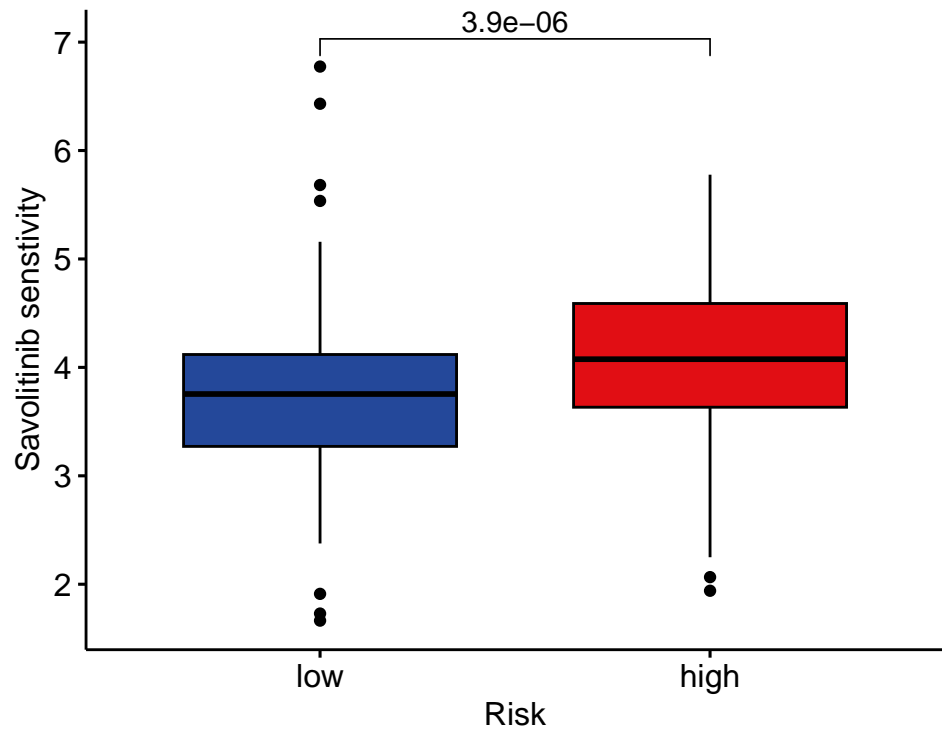



Risk  low  high

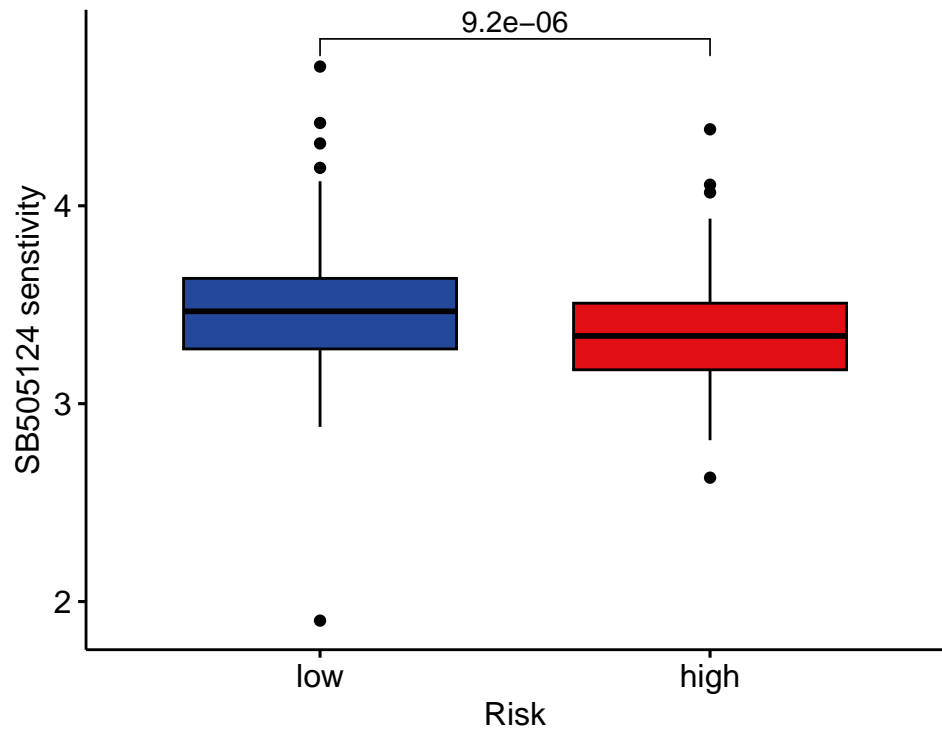

Risk low high

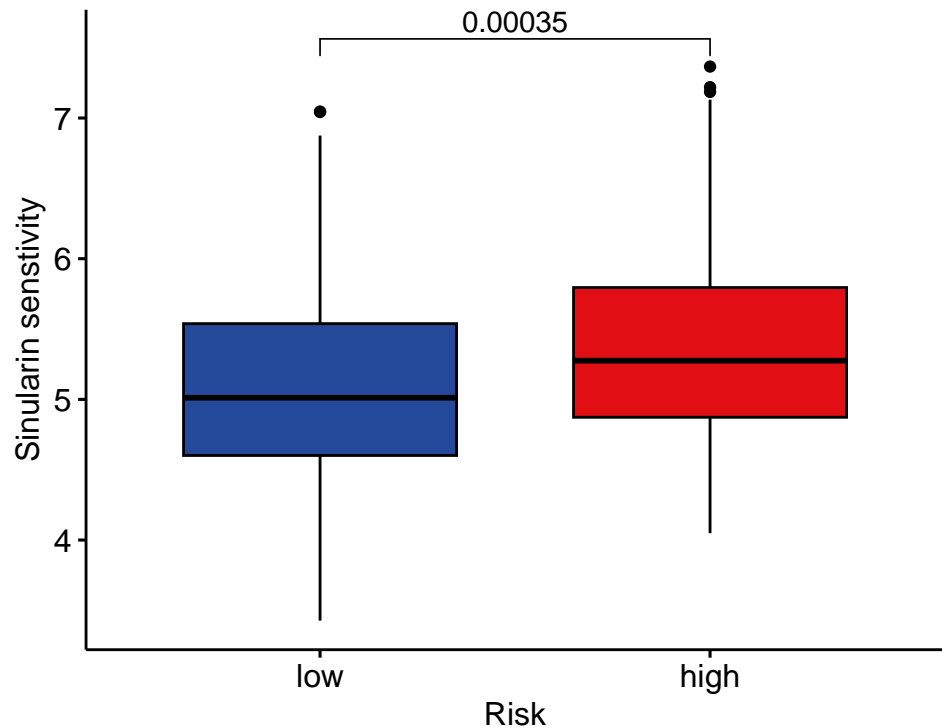

Risk low high

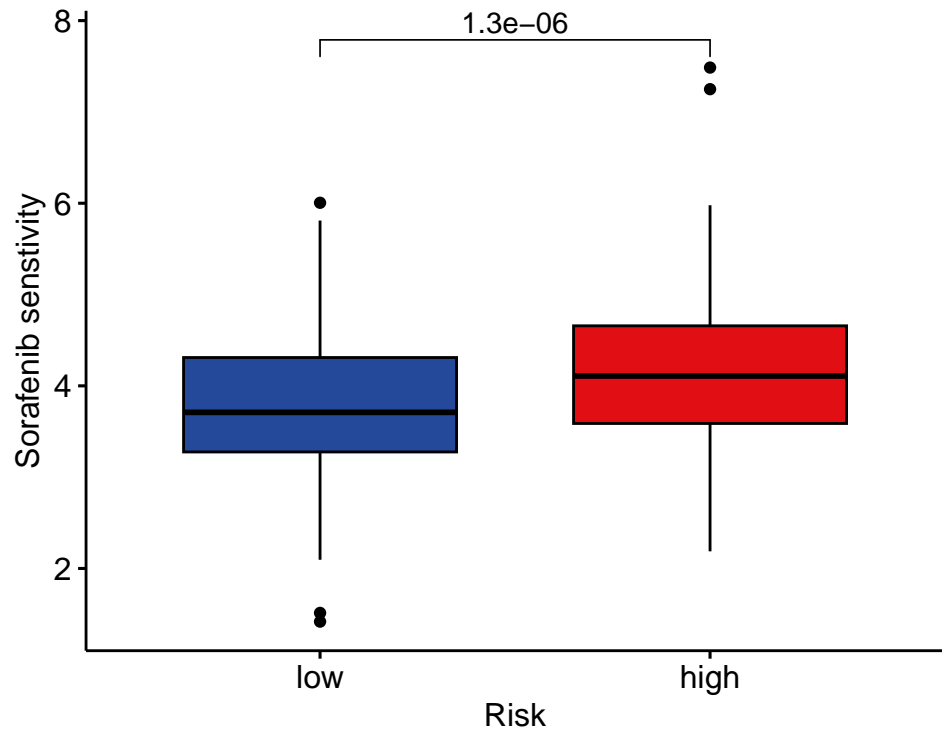

Risk  low  high

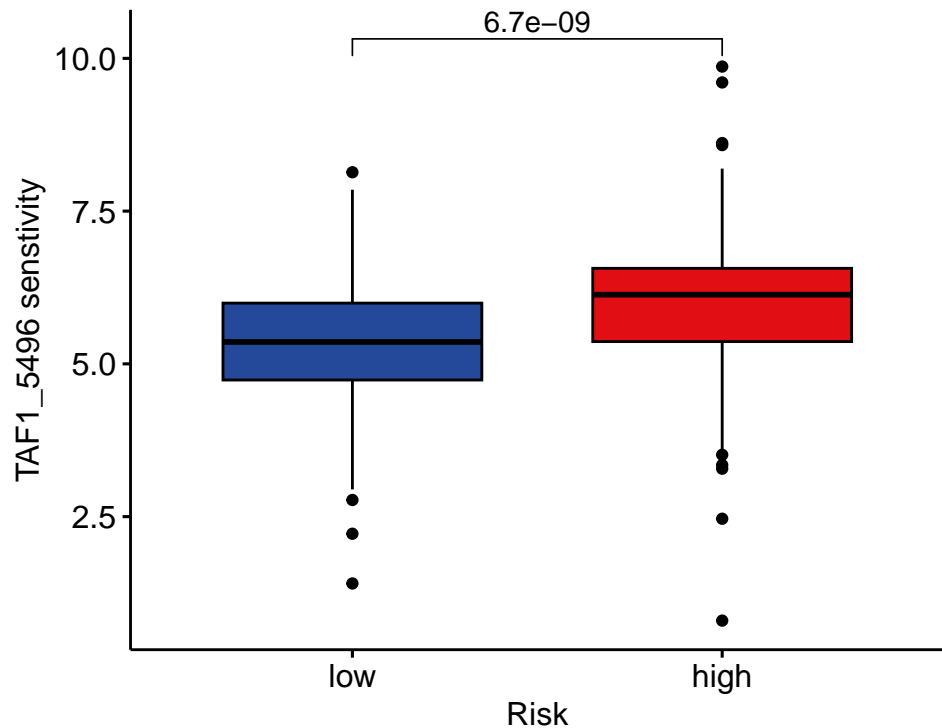

Risk  low  high

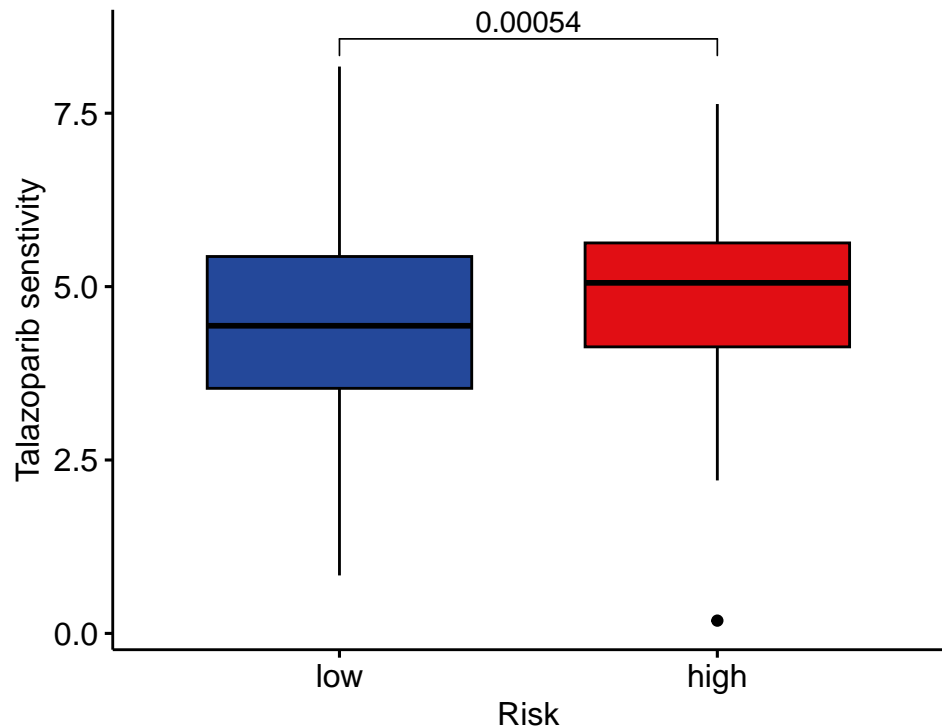

Risk  low  high

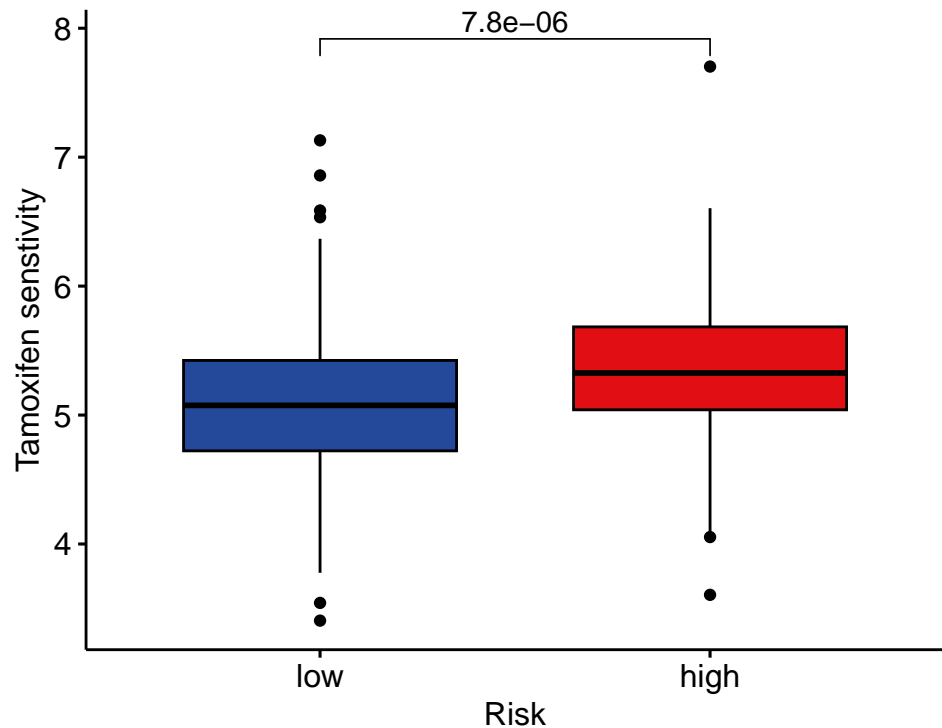

Risk  low  high

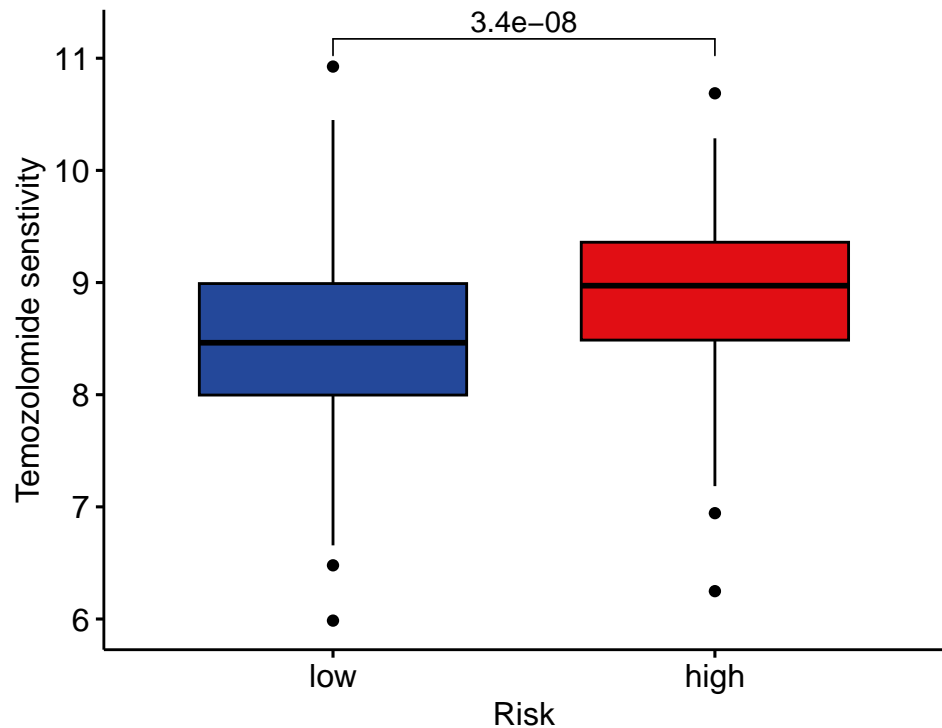

Risk  low  high

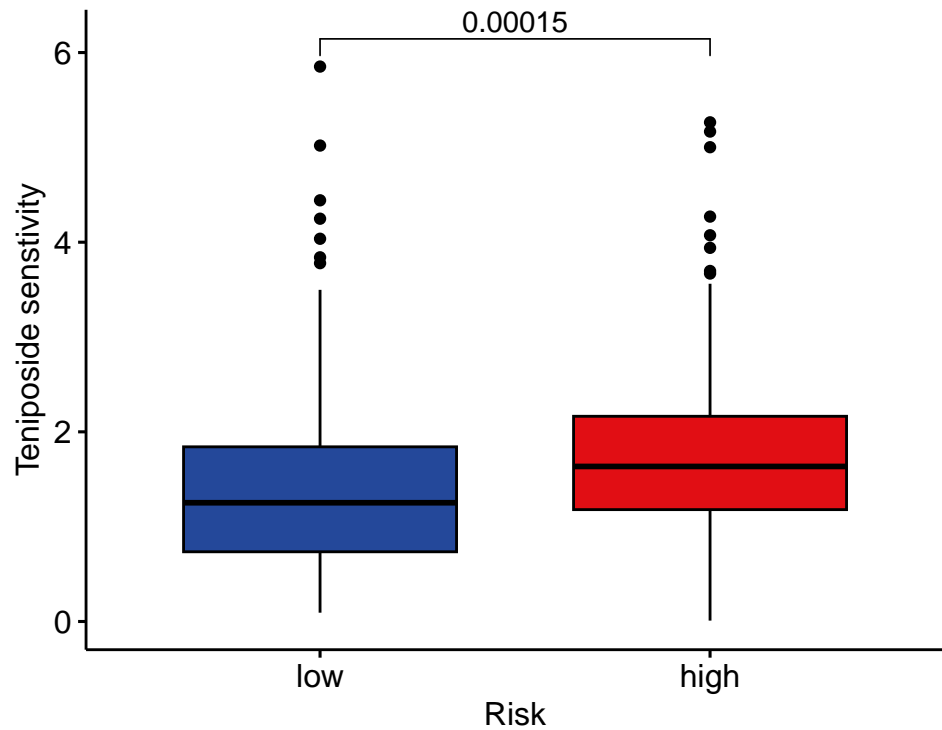





Risk  low  high

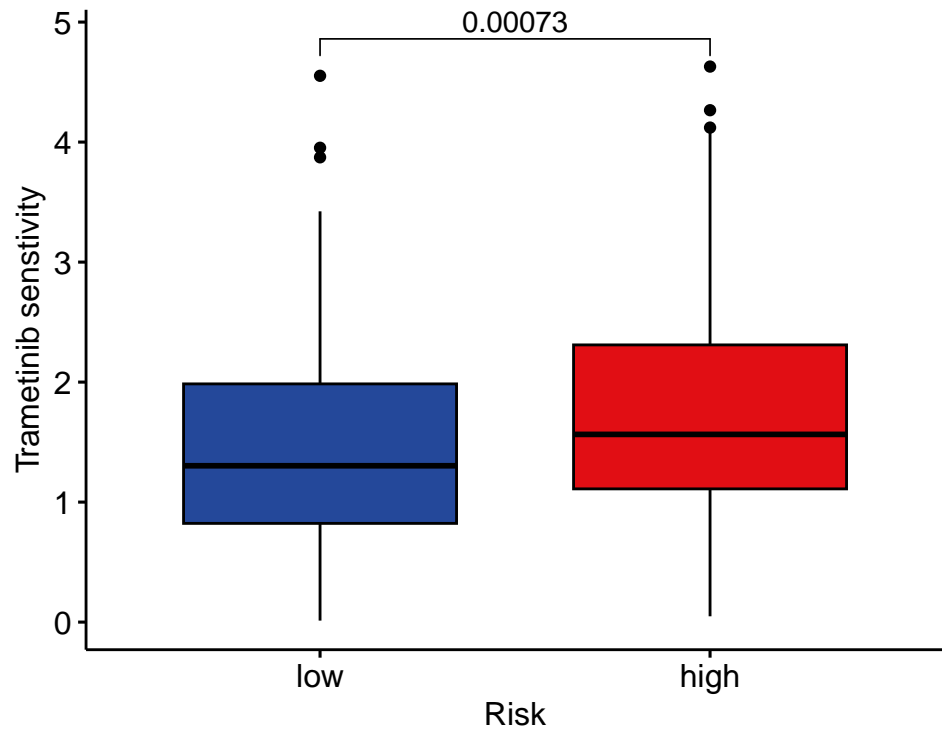

Risk low high

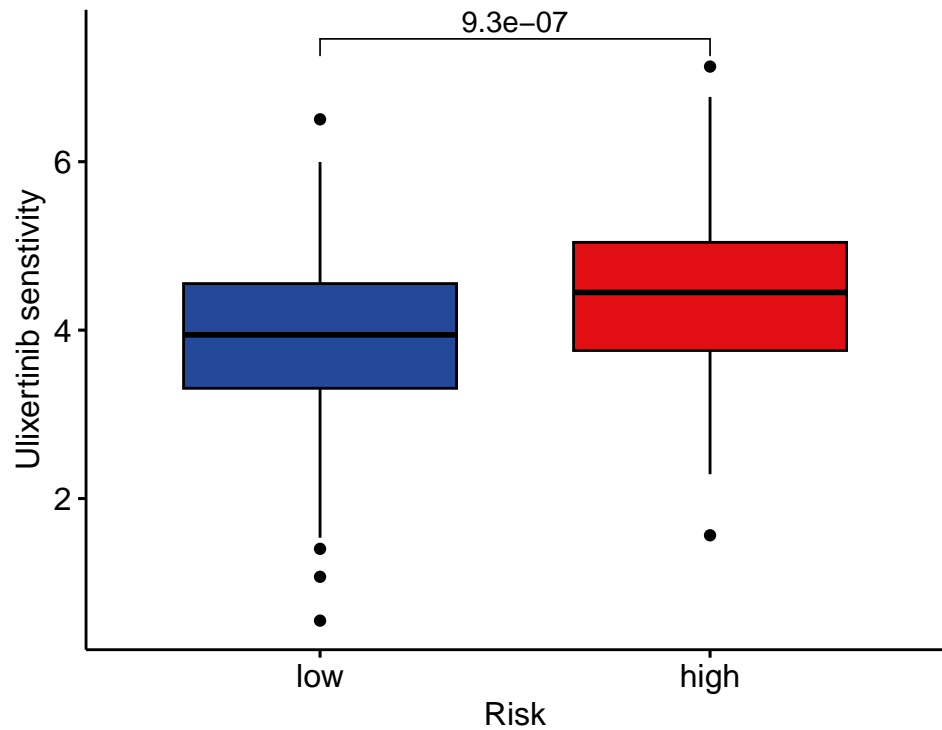

Risk  low  high

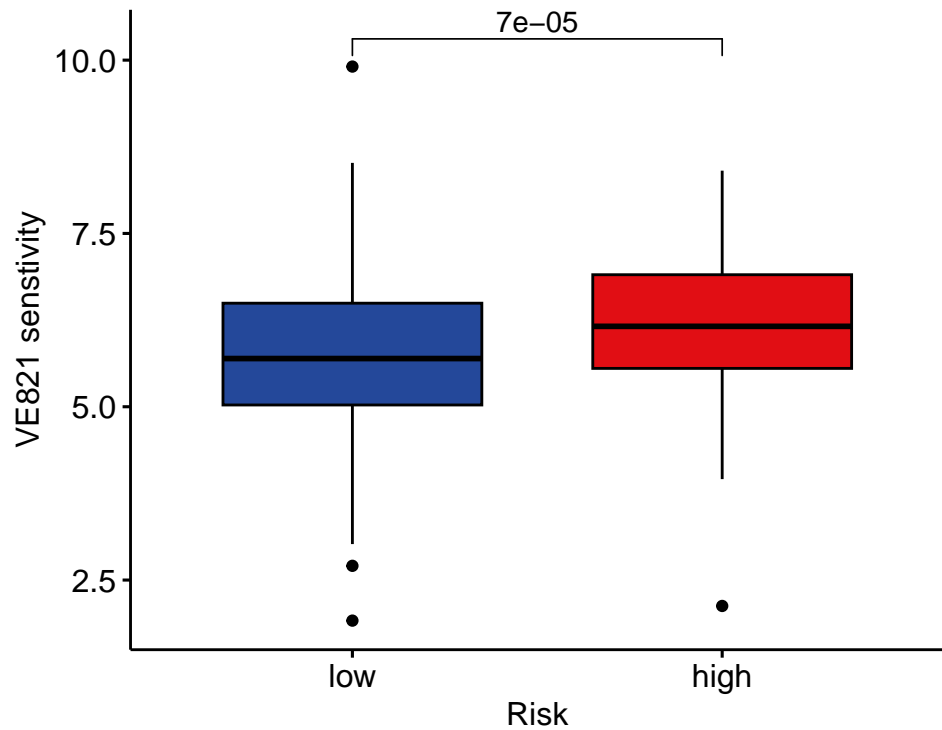

Risk  low  high

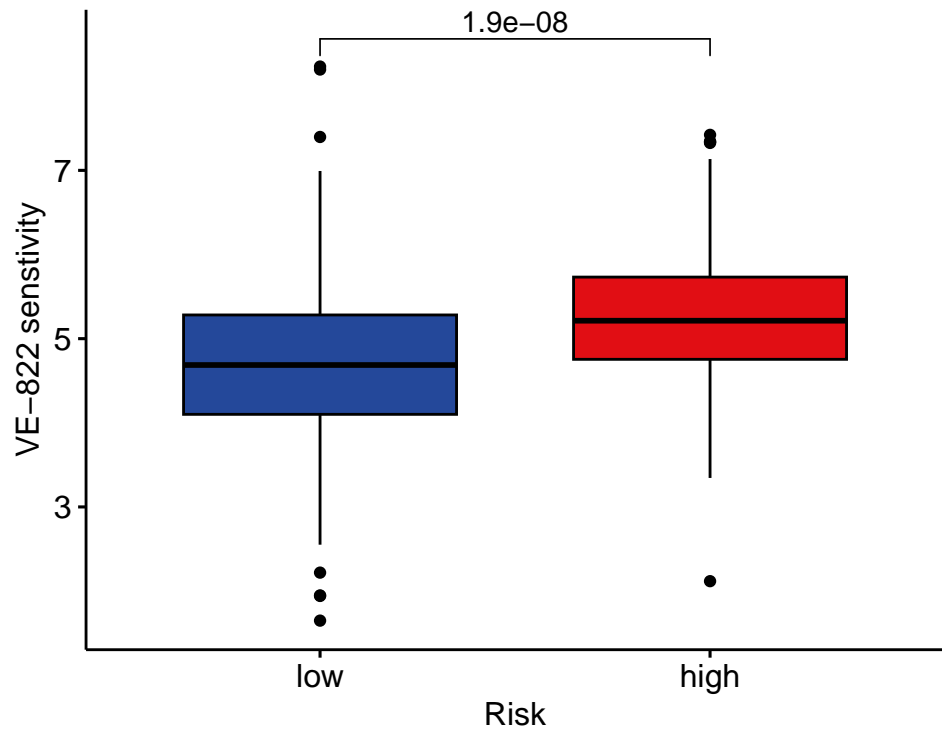

Risk  low  high

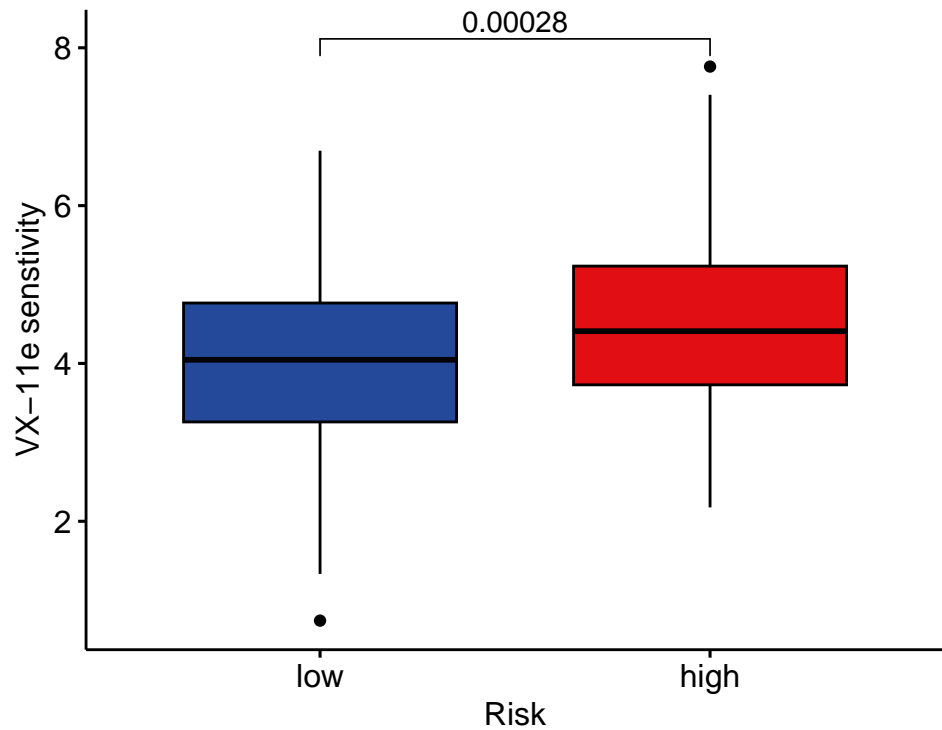

Risk  low  high

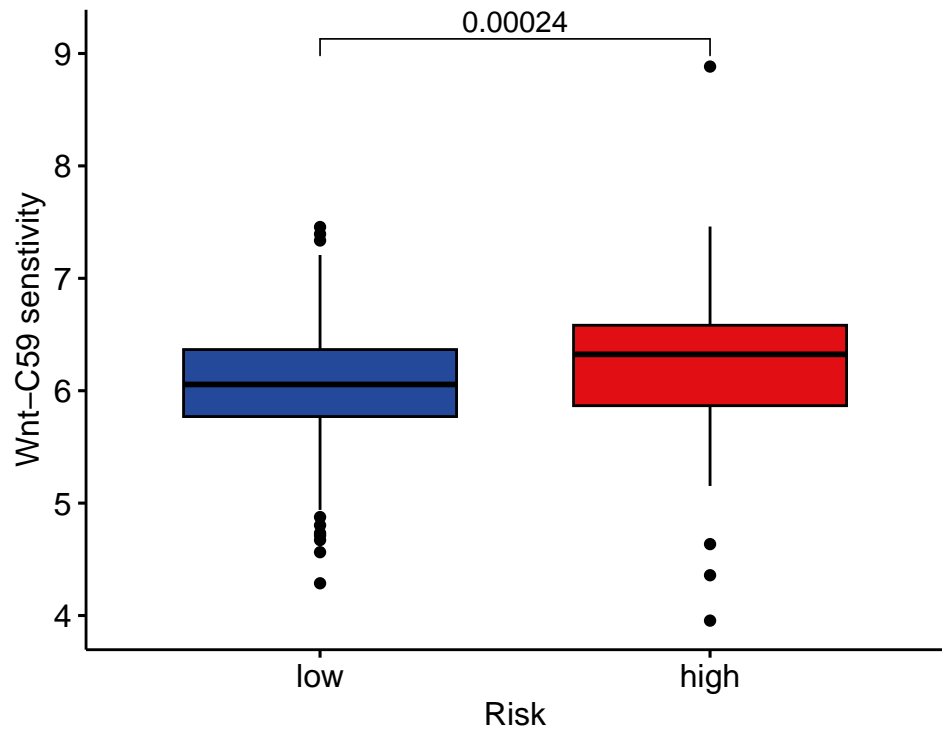

Supplement: s1 [file s1]
