# Supplementary material for: Identification and Validation of a Metabolism-Related Prognostic Signature Associated with M2 Macrophage Infiltration in Gastric Cancer
Source: MDPI journal article supplement (doi:10.3390/ijms241310625), 2023-06-25
Supplement: s1 [file s1]

#### Supplementary file 4

| Gene     | Coef                |
|----------|---------------------|
| NOX4     | 0.100844621411362   |
| STARD3NL | 0.0237286722230089  |
| ABCA1    | 0.0457897125263643  |
| LPL      | 0.0493429851736185  |
| DYNLL1   | 0.242087266953199   |
| SLC5A5   | 0.119571124384521   |
| APOD     | 0.0535727331078263  |
| ELOVL4   | 0.00218250803600714 |
| SRI      | 0.242905051486043   |
| FUT2     | -0.0646240860226172 |
| SMPD3    | -0.0182249057638638 |
| FAAH     | -0.197949344375956  |
