# Supplementary material for: Identification and Validation of a Metabolism-Related Prognostic Signature Associated with M2 Macrophage Infiltration in Gastric Cancer
Source: MDPI journal article supplement (doi:10.3390/ijms241310625), 2023-06-25
Supplement: s1 [file s1]

Supplementary file 1

A4GALT

AACS

AADAT

ABCA1

ABCB11

ABCB4

ABCC1

ABCC3

ABCD1

ABHD3

ABHD4

ABHD5

ABO

AC003665.1

AC092724.1

ACAA1

ACAA2

ACACA

ACACB

ACAD10

ACAD11

ACADL

ACADM

ACADS

ACADSB

ACADVL

ACAT1

ACAT2

ACBD4

ACBD5

ACBD6

ACBD7

ACER1

ACER2

ACER3

ACHE

ACLY

ACO2

ACOT1

ACOT11

ACOT12

ACOT13

ACOT2

ACOT4  
ACOT6  
ACOT7  
ACOT8  
ACOT9  
ACOX1  
ACOX2  
ACOX3  
ACOXL  
ACP6  
ACSBG1  
ACSBG2  
ACSF2  
ACSF3  
ACSL1  
ACSL3  
ACSL4  
ACSL5  
ACSL6  
ACSM3  
ACSM6  
ACSS1  
ACSS3  
ADH1A  
ADH1B  
ADH1C  
ADH4  
ADH5  
ADH6  
ADH7  
ADIPOQ  
ADIPOR1  
ADIPOR2  
ADPRM  
ADSL  
AGK  
AGMO  
AGPAT1  
AGPAT2  
AGPAT3  
AGPAT4  
AGPAT5  
AGPS  
AGRP

AGT  
AHR  
AHRR  
AKR1A1  
AKR1B1  
AKR1B15  
AKR1C1  
AKR1C2  
AKR1C3  
AKR1C4  
AKR1D1  
AKT1  
AKT2  
AKT3  
ALAD  
ALAS1  
ALB  
ALDH1A1  
ALDH1B1  
ALDH2  
ALDH3A1  
ALDH3A2  
ALDH3B1  
ALDH3B2  
ALDH7A1  
ALDH9A1  
ALDOA  
ALOX12  
ALOX12B  
ALOX15  
ALOX15B  
ALOX5  
ALOX5AP  
ALOXE3  
ALPI  
AMACR  
ANGPTL4  
ANKRD1  
AOC3  
APEX1  
APOA1  
APOA2  
APOA5  
APOC3

APOD  
AQP7  
ARF1  
ARF3  
ARNT  
ARNT2  
ARNTL  
ARSA  
ARSB  
ARSD  
ARSE  
ARSF  
ARSG  
ARSH  
ARSI  
ARSJ  
ARSK  
ARV1  
ASAH1  
ASAH2  
AUH  
AWAT1  
AWAT2  
B3GALNT1  
B3GALT1  
B3GALT2  
B3GALT4  
B3GALT5  
B3GNT2  
B3GNT3  
B3GNT4  
B3GNT5  
B4GALNT1  
B4GALT1  
B4GALT2  
B4GALT3  
B4GALT4  
B4GALT6  
B4GAT1  
BAAT  
BCHE  
BCKDHB  
BDH1  
BDH2

BLVRA  
BMPR1B  
BMX  
BPHL  
CA2  
CA4  
CA6  
CAMKK1  
CAMKK2  
CARM1  
CAV1  
CBR1  
CBR3  
CBR4  
CCDC58  
CCNC  
CD1D  
CD36  
CDIPT  
CDK19  
CDK8  
CDS1  
CDS2  
CEL  
CEPT1  
CERK  
CERS1  
CERS2  
CERS3  
CERS4  
CERS5  
CERS6  
CGA  
CH25H  
CHAT  
CHD9  
CHKA  
CHKB  
CHPT1  
CHUK  
CIDEA  
CIDEA  
CLOCK  
COL4A3BP

COMT  
CPNE1  
CPNE3  
CPNE6  
CPNE7  
CPOX  
CPT1A  
CPT1B  
CPT1C  
CPT2  
CPTP  
CRAT  
CREBBP  
CRLS1  
CROT  
CRYZ  
CSNK1G2  
CSNK2A1  
CSNK2A2  
CSNK2B  
CTSA  
CUBN  
CYP11A1  
CYP11B1  
CYP11B2  
CYP17A1  
CYP19A1  
CYP1A1  
CYP1A2  
CYP1B1  
CYP21A2  
CYP24A1  
CYP27A1  
CYP27B1  
CYP2A13  
CYP2A7  
CYP2B6  
CYP2C18  
CYP2C19  
CYP2C8  
CYP2C9  
CYP2D6  
CYP2E1  
CYP2F1

CYP2J2  
CYP2R1  
CYP2U1  
CYP39A1  
CYP3A4  
CYP3A43  
CYP3A5  
CYP3A7  
CYP46A1  
CYP4A11  
CYP4A22  
CYP4B1  
CYP4F11  
CYP4F12  
CYP4F2  
CYP4F22  
CYP4F3  
CYP4F8  
CYP51A1  
CYP7A1  
CYP7B1  
CYP8B1  
D2HGDH  
DBI  
DDHD1  
DDHD2  
DECR1  
DECR2  
DEGS1  
DEGS2  
DGAT1  
DGAT2  
DGAT2L6  
DGKA  
DGKB  
DGKD  
DGKE  
DGKG  
DGKH  
DGKI  
DGKQ  
DGKZ  
DHCR24  
DHCR7

DHRS7B  
DLD  
DLST  
DPEP1  
DPEP2  
DPEP3  
EBP  
ECH1  
ECHS1  
ECI1  
ECI2  
EHHADH  
ELOVL1  
ELOVL2  
ELOVL3  
ELOVL4  
ELOVL5  
ELOVL6  
ELOVL7  
ENO2  
ENO3  
ENPP6  
ENPP7  
EP300  
EPHX1  
EPHX2  
ERP29  
ESRRA  
ESYT1  
ESYT2  
ESYT3  
ETFDH  
ETNK1  
ETNK2  
ETNPPL  
FA2H  
FAAH  
FAAH2  
FABP1  
FABP12  
FABP2  
FABP3  
FABP4  
FABP5



FABP6  
FABP7  
FABP9  
FADS1  
FADS2  
FAM120B  
FAR1  
FAR2  
FASN  
FDFT1  
FDPS  
FDX1  
FDX2  
FDXR  
FH  
FHL2  
FIG4  
FITM1  
FITM2  
FMO1  
FUT1  
FUT2  
FUT3  
FUT4  
FUT5  
FUT6  
FUT7  
FUT9  
G0S2  
G6PC  
G6PC2  
GABARAPL1  
GAD2  
GAL3ST1  
GALC  
GAPDHS  
GBA  
GBA2  
GBGT1  
GC  
GCDH  
GCNT2  
GDE1  
GDPD1

GDPD3  
GDPD5  
GGPS1  
GGT1  
GGT5  
GGT6  
GGT7  
GK  
GK2  
GK3P  
GLA  
GLB1  
GLB1L  
GLIPR1  
GLTP  
GLUL  
GLYCTK  
GM2A  
GNPAT  
GPAM  
GPAT2  
GPAT3  
GPAT4  
GPCPD1  
GPD1  
GPD1L  
GPD2  
GPS2  
GPX1  
GPX2  
GPX3  
GPX4  
GPX5  
GPX6  
GPX7  
GRHL1  
GRHPR  
GSTM4  
GSTZ1  
H2AFZ  
HACD1  
HACD2  
HACD3  
HACD4

HACL1  
HADH  
HADHA  
HADHB  
HAO2  
HCCS  
HDAC3  
HELZ2  
HEXA  
HEXB  
HIBCH  
HILPDA  
HMGCL  
HMGCLL1  
HMGCR  
HMGCS1  
HMGCS2  
HPGD  
HPGDS  
HSD11B1  
HSD11B2  
HSD17B1  
HSD17B10  
HSD17B11  
HSD17B12  
HSD17B13  
HSD17B14  
HSD17B2  
HSD17B3  
HSD17B4  
HSD17B6  
HSD17B7  
HSD17B8  
HSD3B1  
HSD3B2  
HSD3B7  
HSDL2  
HSP90AA1  
HSPH1  
HTD2  
IDH1  
IDH3B  
IDH3G  
IDI1

IDI2  
IKBKB  
IKBKG  
IL4I1  
ILK  
INMT  
INPP4A  
INPP4B  
INPP5D  
INPP5E  
INPP5F  
INPP5J  
INPP5K  
INPPL1  
INSIG1  
INSIG2  
IRS1  
IRS2  
IRS4  
JAK2  
JMJD7-PLA2G4B  
KDSR  
KMT5A  
KPNB1  
LBR  
LCAT  
LCLAT1  
LCN1  
LCN12  
LCN15  
LCN9  
LDHA  
LEP  
LEPR  
LGALS1  
LGMN  
LHB  
LIPA  
LIPC  
LIPE  
LIPF  
LIPG  
LIPH  
LIP1

LPAR1  
LPAR2  
LPAR3  
LPAR5  
LPCAT1  
LPCAT2  
LPCAT3  
LPCAT4  
LPGAT1  
LPIN1  
LPIN2  
LPIN3  
LPL  
LRP2  
LSS  
LTA4H  
LTC4S  
LYPLA1  
LYPLA2  
MAOA  
MAPK10  
MAPK8  
MAPK9  
MAPKAPK2  
MBOAT1  
MBOAT2  
MBOAT7  
MBTPS1  
MBTPS2  
MCAT  
MCEE  
MDH1  
MDH2  
ME1  
MECR  
MED1  
MED10  
MED11  
MED12  
MED13  
MED13L  
MED14  
MED15  
MED16

MED17  
MED18  
MED19  
MED20  
MED21  
MED22  
MED23  
MED24  
MED25  
MED26  
MED27  
MED28  
MED29  
MED30  
MED31  
MED4  
MED6  
MED7  
MED8  
MED9  
METAP1  
MFSD2A  
MGLL  
MID1IP1  
MIF  
MIGA1  
MIGA2  
MLYCD  
MMAA  
MMP1  
MMUT  
MOGAT1  
MOGAT2  
MOGAT3  
MORC2  
MSMO1  
MTF1  
MTM1  
MTMR1  
MTMR10  
MTMR12  
MTMR14  
MTMR2  
MTMR3

MTMR4  
MTMR6  
MTMR7  
MTMR8  
MTMR9  
MTOR  
MVD  
MVK  
NAGA  
NBN  
NCAPH2  
NCOA1  
NCOA2  
NCOA3  
NCOA6  
NCOR1  
NCOR2  
NDUFAB1  
NEU1  
NEU2  
NEU3  
NEU4  
NFKB1  
NFKBIA  
NFKBIB  
NFKBIE  
NFYA  
NFYB  
NFYC  
NPAS2  
NPY  
NR1D1  
NR1H2  
NR1H3  
NR1H4  
NRF1  
NSDHL  
NTHL1  
NUDT19  
OCRL  
ODC1  
OLAH  
OLR1  
ORMDL1

ORMDL2  
ORMDL3  
OSBP  
OSBPL10  
OSBPL1A  
OSBPL2  
OSBPL3  
OSBPL5  
OSBPL6  
OSBPL8  
OSBPL9  
OSTC  
OXCT1  
OXCT2  
PCBD1  
PCCA  
PCCB  
PCK1  
PCK2  
PCTP  
PCYT1A  
PCYT1B  
PCYT2  
PDHA1  
PDHB  
PDPK1  
PECR  
PEMT  
PEX11A  
PGS1  
PHOSPHO1  
PHYH  
PI4K2A  
PI4K2B  
PI4KA  
PI4KB  
PIAS4  
PIK3C2A  
PIK3C2B  
PIK3C2G  
PIK3C3  
PIK3CA  
PIK3CB  
PIK3CD



PIK3CG  
PIK3R1  
PIK3R2  
PIK3R3  
PIK3R4  
PIK3R5  
PIK3R6  
PIKFYVE  
PIP4K2A  
PIP4K2B  
PIP4K2C  
PIP4P1  
PIP5K1A  
PIP5K1B  
PIP5K1C  
PISD  
PITPNB  
PITPNM1  
PITPNM2  
PITPNM3  
PLA1A  
PLA2G10  
PLA2G12A  
PLA2G12B  
PLA2G15  
PLA2G1B  
PLA2G2A  
PLA2G2C  
PLA2G2D  
PLA2G2E  
PLA2G2F  
PLA2G3  
PLA2G4A  
PLA2G4B  
PLA2G4C  
PLA2G4D  
PLA2G4E  
PLA2G4F  
PLA2G5  
PLA2G6  
PLA2R1  
PLAAT1  
PLAAT2  
PLAAT3

PLAAT4  
PLAAT5  
PLB1  
PLBD1  
PLD1  
PLD2  
PLD3  
PLD4  
PLD6  
PLEKHA1  
PLEKHA2  
PLEKHA3  
PLEKHA4  
PLEKHA5  
PLEKHA6  
PLEKHA8  
PLIN1  
PLIN2  
PLIN3  
PLPP1  
PLPP2  
PLPP3  
PLPP6  
PLPPR1  
PLPPR2  
PLPPR3  
PLPPR4  
PLPPR5  
PLTP  
PMVK  
PNLIP  
PNLIPRP1  
PNLIPRP2  
PNPLA2  
PNPLA3  
PNPLA4  
PNPLA5  
PNPLA6  
PNPLA7  
PNPLA8  
POMC  
PON1  
PON2  
PON3

PPARA  
PPARD  
PPARG  
PPARGC1A  
PPARGC1B  
PPM1L  
PPP1CA  
PPP1CB  
PPP1CC  
PPT1  
PPT2  
PRDX6  
PRKAA1  
PRKAA2  
PRKAB1  
PRKAB2  
PRKACA  
PRKACB  
PRKACG  
PRKAG1  
PRKAG2  
PRKAG3  
PRKCQ  
PRKD1  
PRKD2  
PRKD3  
PRXL2B  
PSAP  
PSME1  
PTDSS1  
PTDSS2  
PTEN  
PTGDS  
PTGES  
PTGES2  
PTGES3  
PTGIS  
PTGR1  
PTGR2  
PTGS1  
PTGS2  
PTPMT1  
PTPN11  
PTPN13

PTPRG  
PTS  
RAB14  
RAB4A  
RAB5A  
RAN  
RAP1GDS1  
RDH11  
RDH16  
REEP6  
RELA  
RETSAT  
RGL1  
RORA  
RUFY1  
RXRA  
RXRB  
RXRG  
S100A10  
S1PR1  
S1PR2  
S1PR3  
S1PR4  
S1PR5  
SACM1L  
SAMD8  
SAR1B  
SBF1  
SBF2  
SC5D  
SCAP  
SCD  
SCD5  
SCP2  
SDHA  
SDHC  
SDHD  
SEC23A  
SEC24A  
SEC24B  
SEC24C  
SEC24D  
SELENOI  
SERINC1

SGMS1  
SGMS2  
SGPL1  
SGPP1  
SGPP2  
SIN3A  
SIN3B  
SLC10A1  
SLC10A2  
SLC22A5  
SLC25A1  
SLC25A17  
SLC25A20  
SLC27A1  
SLC27A2  
SLC27A3  
SLC27A4  
SLC27A5  
SLC27A6  
SLC2A1  
SLC2A4  
SLC33A1  
SLC44A1  
SLC44A2  
SLC44A3  
SLC44A4  
SLC44A5  
SLCO1A2  
SLCO1B1  
SLCO1B3  
SMARCD3  
SMPD1  
SMPD2  
SMPD3  
SMPD4  
SMS  
SOAT1  
SOAT2  
SOCS3  
SORBS1  
SP1  
SPHK1  
SPHK2  
SPTLC1

SPTLC2  
SPTLC3  
SPTSSA  
SPTSSB  
SQLE  
SRD5A1  
SRD5A2  
SRD5A3  
SREBF1  
SREBF2  
ST3GAL1  
ST3GAL2  
ST3GAL3  
ST3GAL4  
ST3GAL5  
ST3GAL6  
ST6GALNAC3  
ST6GALNAC4  
ST6GALNAC5  
ST6GALNAC6  
ST8SIA1  
ST8SIA5  
STAR  
STARD10  
STARD3  
STARD3NL  
STARD4  
STARD5  
STARD6  
STARD7  
STAT3  
STK11  
STS  
SUCLA2  
SUCLG1  
SUCLG2  
SULT1E1  
SULT2A1  
SULT2B1  
SUMF1  
SUMF2  
SUMO2  
SYNJ1  
SYNJ2

TAZ  
TBL1X  
TBL1XR1  
TBXAS1  
TDO2  
TECR  
TECRL  
TGS1  
THEM4  
THEM5  
THRAP3  
THRSP  
TIAM2  
TKFC  
TM7SF2  
TMEM86B  
TNF  
TNFAIP8  
TNFAIP8L1  
TNFAIP8L2  
TNFAIP8L3  
TNFRSF1A  
TNFRSF1B  
TNFRSF21  
TP53INP2  
TPTE  
TPTE2  
TRADD  
TRAF2  
TRIB3  
TSPO  
TSPOAP1  
TXNRD1  
UBC  
UBE2I  
UBE2L6  
UCP1  
UGCG  
UGDH  
UGT1A1  
UGT1A10  
UGT1A3  
UGT1A4  
UGT1A5

UGT1A6  
UGT1A7  
UGT1A8  
UGT1A9  
UGT2A1  
UGT2A3  
UGT2B10  
UGT2B11  
UGT2B15  
UGT2B17  
UGT2B28  
UGT2B4  
UGT2B7  
UGT8  
UROD  
UROS  
VAC14  
VAPA  
VAPB  
VDR  
VNN1  
XIST  
YWHAH  
GLS  
GLS2  
GLUD1  
GLUD2  
GOT2  
KYAT1  
OAT  
PYCR1  
PYCR2  
PYCR3  
RIMKLA  
RIMKLB  
AAAS  
ABCC8  
AC004551.1  
AC016586.1  
ACTN3  
ADCY5  
ADCY8  
ADPGK  
ADRA2A



AGER  
AIFM1  
ALDH5A1  
ALDOB  
ALDOC  
ANLN  
ANO1  
APPL1  
APPL2  
AQP3  
ARPP19  
ARRB1  
ART3  
ASIP  
ASNS  
ASPSCR1  
ATF4  
ATG14  
B3GNT6  
BAD  
BAIAP3  
BCL2  
BECN1  
BHLHA15  
BPGM  
BRAF  
BRAT1  
BRS3  
BRSK2  
C12orf66  
C1QTNF1  
C1QTNF12  
C1QTNF2  
C2CD2L  
C2CD5  
C3  
CALR  
CANX  
CAPN10  
CARTPT  
CASR  
CBL  
CCPG1  
CDK1

CDK16  
CDT1  
CFTR  
CLGN  
CLIP3  
CLTCL1  
CLTRN  
CMA1  
COX11  
CPB2  
CPEB4  
CREBL2  
CREM  
CRH  
CXCL2  
CYBA  
DCXR  
DDIT4  
DLAT  
DNAJB11  
DNAJC3  
DNM1L  
DPP4  
DRD1  
DUSP12  
DYNLL1  
DYRK2  
EDN1  
EDNRA  
EFNA5  
EIF2AK3  
ELF3  
ENDOG  
ENO1  
ENPP1  
ENY2  
EPHA5  
EPM2AIP1  
ERN1  
ERO1B  
ESRRB  
FBP1  
FBP2  
FFAR1

FFAR4  
FGF19  
FGF21  
FIS1  
FKBP1B  
FKBP2  
FOXA2  
FOXA3  
FOXO1  
FOXO3  
G6PC3  
G6PD  
GAA  
GABARAPL3  
GADD45A  
GALM  
GAPDH  
GAS6  
GATA4  
GCG  
GCGR  
GCK  
GCKR  
GCLC  
GCLM  
GDPGP1  
GFAP  
GFPT1  
GH1  
GHRHR  
GHRL  
GIP  
GJB6  
GNB3  
GNPDA1  
GNPDA2  
GOT1  
GPC3  
GPER1  
GPI  
GPLD1  
GPR119  
GPR27  
GPR68

GRB10  
GRIK5  
GSDME  
GSK3A  
GSK3B  
GYS1  
H6PD  
HECTD4  
HIF1A  
HIGD1A  
HIST1H4J  
HK1  
HK2  
HK3  
HKDC1  
HMGN3  
HNF1A  
HNRNPA1  
HSPA5  
ICAM1  
IFI16  
IGF1  
IGF1R  
IGF2  
IGFBP3  
IGFBP4  
IGFBP5  
IL1B  
IMPACT  
INS  
INSR  
ISL1  
ITFG2  
ITLN1  
JAGN1  
KCNB1  
KCNF1  
KCNJ11  
KDEL2  
KHK  
KIF5B  
KIF5C  
KLF15  
KPTN

LCMT1  
LIN28A  
LNPEP  
LRP1  
LRP5  
LRP5L  
MAP4K4  
MAPK14  
MEF2A  
MEN1  
MIDN  
MIR103A1  
MIR103A2  
MIR107  
MIR143  
MIR15A  
MIR16-1  
MIR16-2  
MIR223  
MIRLET7G  
MLXIPL  
MPC2  
MYBBP1A  
NADK  
NDC1  
NDUFAF2  
NDUFB3  
NEUROD1  
NFE2L1  
NFE2L2  
NGFR  
NIM1K  
NISCH  
NKX1-1  
NME1  
NME2  
NOX4  
NPY1R  
NR4A3  
NUAK2  
NUCKS1  
NUP107  
NUP133  
NUP153

NUP155  
NUP160  
NUP188  
NUP205  
NUP210  
NUP214  
NUP35  
NUP37  
NUP43  
NUP50  
NUP54  
NUP58  
NUP62  
NUP85  
NUP88  
NUP93  
NUP98  
NUPL2  
OCLN  
OMA1  
ONECUT1  
OPA1  
OPRK1  
OSTN  
PASK  
PAX2  
PAX6  
PBK  
PC  
PCSK1  
PDHA2  
PDIA3  
PDIA4  
PDIA6  
PDK1  
PDK2  
PDK3  
PDK4  
PDX1  
PEA15  
PFKFB1  
PFKFB2  
PFKFB3  
PFKFB4

PFKL  
PFKM  
PFKP  
PGAM1  
PGAM2  
PGK1  
PGK2  
PGM1  
PGM2  
PGM2L1  
PGM5  
PGP  
PHKG2  
PHLDA2  
PHPT1  
PICK1  
PID1  
PIGA  
PIH1D1  
PIM3  
PKLR  
PKM  
PLK3  
PMAIP1  
POLG  
POM121  
POM121C  
POU4F2  
PPEF2  
PPIB  
PPP1R3A  
PPP1R3B  
PPP1R3D  
PPP1R3E  
PPP1R3F  
PPP1R3G  
PPP2CA  
PPP2CB  
PPP2R1A  
PPP2R1B  
PPP2R5D  
PPP3CA  
PPP3CB  
PRAME

PREB  
PRKCB  
PRKCE  
PRKCI  
PRKCZ  
PRKN  
PTH  
PTPRN  
PTPRN2  
PYGL  
RAB11B  
RAB11FIP2  
RAB11FIP5  
RAB4B  
RACK1  
RAE1  
RAF1  
RANBP2  
RAP1A  
RELB  
RFX6  
RGN  
RHOQ  
RNASEL  
RORC  
RPS6KB1  
RRM2  
RRP8  
RSC1A1  
RTN2  
SARS  
SEC11A  
SEC11C  
SEC13  
SEH1L  
SELENOS  
SELENOT  
SEMG1  
SEPHS2  
SERP1  
SERPINF1  
SESN1  
SESN2  
SESN3



SFN  
SGK3  
SH3GLB1  
SIDT2  
SIK1  
SIK1B  
SIK2  
SIRT1  
SLC1A2  
SLC25A10  
SLC25A11  
SLC25A12  
SLC25A13  
SLC25A27  
SLC29A1  
SLC2A3  
SLC2A8  
SLC35B1  
SLC37A1  
SLC37A2  
SLC37A4  
SLC3A2  
SLC45A3  
SLC5A1  
SLC5A10  
SLC5A11  
SLC5A2  
SLC5A3  
SLC5A4  
SLC5A9  
SLC9B2  
SMARCA4  
SMARCB1  
SORD  
SORT1  
SOX4  
SPCS1  
SPCS2  
SPCS3  
SRC  
SRF  
SRI  
STX4  
STXBP3

STXBP4  
SYBU  
SZT2  
TBC1D4  
TBL2  
TERT  
TFAP2B  
TFF3  
TFRC  
TGIF1  
TH  
TIAM1  
TIGAR  
TKTL1  
TP53  
TPI1  
TPR  
TRA2B  
TRARG1  
TRIP10  
TRPM4  
TRPS1  
TSC1  
TWNK  
TXNIP  
UCP2  
UGP2  
UNC13B  
UPP1  
USF1  
USF2  
VAMP2  
VSNL1  
WDR35  
WDTC1  
XBP1  
YES1  
YWHAB  
YWHAE  
YWHAG  
YWHAQ  
YWHAZ  
ZAP70  
ZBTB20

ZC3H12A  
ZMPSTE24  
ZNF236  
ACSS2  
ALDH1A3  
G6PC1  
LDHAL6A  
LDHAL6B  
LDHB  
LDHC  
PGAM4  
ACO1  
CS  
DHTKD1  
IDH2  
IDH3A  
MDH1B  
MRPS36  
NNT  
OGDH  
OGDHL  
SDHAF2  
SDHB  
ABCC6  
AK1  
AK2  
AK4  
AK5  
AK9  
ANTKMT  
APP  
ARL2  
ATP1A2  
ATP1B1  
ATP5F1A  
ATP5F1B  
ATP5F1C  
ATP5F1D  
ATP5F1E  
ATP5F1EP2  
ATP5IF1  
ATP5MC1  
ATP5MC2  
ATP5MC3

ATP5ME  
ATP5MF  
ATP5MG  
ATP5MGL  
ATP5MJ  
ATP5MK  
ATP5PB  
ATP5PD  
ATP5PF  
ATP5PO  
ATP6V0C  
ATP6V1A  
ATP6V1B1  
ATP6V1B2  
ATPSCKMT  
BEND3  
CBFA2T3  
CLPX  
CTNS  
DGUOK  
DMAC2L  
DNAJC30  
EIF6  
ENO4  
ENPP3  
FIGNL1  
FLCN  
FOXK1  
FOXK2  
GALK1  
GIT1  
H19  
HDAC4  
HSPA1A  
HSPA1B  
HSPA8  
HTR2A  
IFNG  
IL4  
JMJD8  
MIR675  
MLST8  
MT-ATP6  
MT-ATP8

MT-CO2  
MT-ND1  
MT-ND2  
MT-ND3  
MT-ND4  
MT-ND4L  
MT-ND5  
MT-ND6  
MTCO2P12  
MYH3  
MYH4  
MYH6  
MYH7  
MYH8  
NDUFA1  
NDUFA10  
NDUFA11  
NDUFA12  
NDUFA13  
NDUFA2  
NDUFA3  
NDUFA5  
NDUFA6  
NDUFA7  
NDUFA8  
NDUFA9  
NDUFB1  
NDUFB10  
NDUFB11  
NDUFB2  
NDUFB4  
NDUFB5  
NDUFB6  
NDUFB7  
NDUFB8  
NDUFB9  
NDUFC1  
NDUFC2  
NDUFS1  
NDUFS2  
NDUFS3  
NDUFS4  
NDUFS5  
NDUFS6

NDUFS7  
NDUFS8  
NDUFV1  
NDUFV2  
NDUFV3  
NMNAT1  
NT5E  
NUDT2  
NUDT5  
NUPR1  
OGT  
OLA1  
P2RX7  
PARG  
PARP1  
PINK1  
PRXL2C  
PSEN1  
RPTOR  
SIRT6  
SLC25A25  
SLC2A6  
SLC4A1  
SLC4A4  
STOML2  
TAFAZZIN  
TGFB1  
TMSB4X  
TREM2  
TREX1  
UQCC3  
VCP  
VPS9D1  
ZBTB7A  
AANAT  
AASS  
ACAD8  
ACMSD  
ADI1  
ADO  
AFMID  
AGMAT  
AGXT  
AGXT2

AHCY  
AIMP1  
AIMP2  
ALDH18A1  
ALDH4A1  
ALDH6A1  
AMD1  
AMDHD1  
AMT  
APIP  
ARG1  
ARG2  
ASL  
ASMT  
ASPA  
ASPG  
ASRGL1  
ASS1  
AZIN1  
AZIN2  
BBOX1  
BCAT1  
BCAT2  
BCKDHA  
BCKDK  
BHMT  
BHMT2  
CARNMT1  
CARNS1  
CBS  
CDO1  
CHDH  
CKB  
CKM  
CKMT1A  
CKMT1B  
CKMT2  
CPS1  
CRYM  
CSAD  
CTH  
DAO  
DARS1  
DBH

DBT  
DCT  
DDC  
DDO  
DIO1  
DIO2  
DIO3  
DMGDH  
DUOX1  
DUOX2  
EEF1E1  
EEFSEC  
ENOPH1  
EPRS1  
ETHE1  
FAH  
FAU  
FOLH1  
FTCD  
GADL1  
GAMT  
GATM  
GCAT  
GCSH  
GLDC  
GNMT  
GPT  
GPT2  
GSR  
HAAO  
HAL  
HAO1  
HDC  
HGD  
HIBADH  
HNMT  
HOGA1  
HPD  
HYKK  
IARS1  
IDO1  
IDO2  
IVD  
IYD



KARS1  
KMO  
KYAT3  
KYN  
LARS1  
LIAS  
LIPT1  
LIPT2  
MARS1  
MAT1A  
MCCC1  
MCCC2  
MPST  
MRI1  
MTAP  
MTR  
MTRR  
NAALAD2  
NAGS  
NAT8L  
NMRAL1  
NNMT  
NQO1  
OAZ1  
OAZ2  
OAZ3  
OCA2  
OTC  
PAH  
PAOX  
PAPSS1  
PAPSS2  
PDHX  
PHGDH  
PHYKPL  
PIPOX  
PNMT  
PPM1K  
PRODH  
PRODH2  
PSAT1  
PSMA1  
PSMA2  
PSMA3

PSMA4  
PSMA5  
PSMA6  
PSMA7  
PSMA8  
PSMB1  
PSMB10  
PSMB11  
PSMB2  
PSMB3  
PSMB4  
PSMB5  
PSMB6  
PSMB7  
PSMB8  
PSMB9  
PSMC1  
PSMC2  
PSMC3  
PSMC4  
PSMC5  
PSMC6  
PSMD1  
PSMD10  
PSMD11  
PSMD12  
PSMD13  
PSMD14  
PSMD2  
PSMD3  
PSMD4  
PSMD5  
PSMD6  
PSMD7  
PSMD8  
PSMD9  
PSME2  
PSME3  
PSME4  
PSMF1  
PSPH  
PSTK  
PXMP2  
QARS1

QDPR  
RARS1  
RIDA  
RPL10  
RPL10A  
RPL10L  
RPL11  
RPL12  
RPL13  
RPL13A  
RPL14  
RPL15  
RPL17  
RPL18  
RPL18A  
RPL19  
RPL21  
RPL22  
RPL22L1  
RPL23  
RPL23A  
RPL24  
RPL26  
RPL26L1  
RPL27  
RPL27A  
RPL28  
RPL29  
RPL3  
RPL30  
RPL31  
RPL32  
RPL34  
RPL35  
RPL35A  
RPL36  
RPL36A  
RPL36AL  
RPL37  
RPL37A  
RPL38  
RPL39  
RPL39L  
RPL3L

RPL4  
RPL41  
RPL5  
RPL6  
RPL7  
RPL7A  
RPL8  
RPL9  
RPLP0  
RPLP1  
RPLP2  
RPS10  
RPS11  
RPS12  
RPS13  
RPS14  
RPS15  
RPS15A  
RPS16  
RPS17  
RPS18  
RPS19  
RPS2  
RPS20  
RPS21  
RPS23  
RPS24  
RPS25  
RPS26  
RPS27  
RPS27A  
RPS27L  
RPS28  
RPS29  
RPS3  
RPS3A  
RPS4X  
RPS4Y1  
RPS4Y2  
RPS5  
RPS6  
RPS7  
RPS8  
RPS9

RPSA  
SARDH  
SARS1  
SAT1  
SCLY  
SDS  
SDSL  
SECISBP2  
SEM1  
SEPSECS  
SERINC2  
SERINC3  
SERINC4  
SERINC5  
SHMT1  
SLC25A15  
SLC25A2  
SLC25A21  
SLC25A44  
SLC36A4  
SLC45A2  
SLC5A5  
SLC6A11  
SLC6A12  
SLC6A7  
SLC6A8  
SLC7A5  
SMOX  
SQOR  
SRM  
SRR  
SUOX  
TAT  
TMLHE  
TPH1  
TPH2  
TPO  
TSHB  
TST  
TSTD1  
TXN2  
TYR  
TYRP1  
UBA52

UROC1
