# Supplementary material for: Identification and Validation of a Metabolism-Related Prognostic Signature Associated with M2 Macrophage Infiltration in Gastric Cancer
Source: MDPI journal article supplement (doi:10.3390/ijms241310625), 2023-06-25
Supplement: s1 [file s1]

**Supplementary file 2**  
**Primers for qRT-PCR**

| <b>Transcript</b> | <b>Forward</b>          | <b>Reverse</b>         |
|-------------------|-------------------------|------------------------|
| SRI               | ATCAAGAGGAAGCTGCATGA    | ATTACCGAAGGCAAAGAGGA   |
| TNF- $\alpha$     | CAGACTTC CTTGAGACACGG   | CAAGGCAGCTCCTACATTGG   |
| CD86              | CTGCTCATCTATACACGGTTACC | GGAAACGTCGTACAGTTCTGTG |
| CD163             | GCGGGAGAGTGGAAGTGAAAG   | GTTACAAATCACAGAGACCGCT |
| CD206             | CTACAAGGGATCGGGTTTATGGA | TTGGCATTGCCTAGTAGCGTA  |
| GAPDH             | GACAGTCAGCCGCATCTTCT    | TTAAAAGCAGCCCTGGTGAG   |
