# Supplementary material for: Identification and Validation of a Metabolism-Related Prognostic Signature Associated with M2 Macrophage Infiltration in Gastric Cancer
Source: MDPI journal article supplement (doi:10.3390/ijms241310625), 2023-06-25
Supplement: s1 [file s1]

Supplementary file 3

| Cell           | Gene     | Cor(TCGA) | pvalue   |
|----------------|----------|-----------|----------|
| Macrophages M2 | TREM2    | 0.531001  | 1.05E-14 |
| Macrophages M2 | OLR1     | 0.430199  | 1.22E-09 |
| Macrophages M2 | ASAH1    | 0.425259  | 1.96E-09 |
| Macrophages M2 | LIPA     | 0.416665  | 4.44E-09 |
| Macrophages M2 | NOX4     | 0.39662   | 2.72E-08 |
| Macrophages M2 | STARD3NL | 0.392071  | 4.05E-08 |
| Macrophages M2 | LGMN     | 0.390561  | 4.61E-08 |
| Macrophages M2 | SERPINF1 | 0.382444  | 9.16E-08 |
| Macrophages M2 | PEA15    | 0.377772  | 1.35E-07 |
| Macrophages M2 | HSD17B14 | 0.36922   | 2.70E-07 |
| Macrophages M2 | CPT1C    | 0.357939  | 6.53E-07 |
| Macrophages M2 | HSD11B1  | 0.355005  | 8.18E-07 |
| Macrophages M2 | LGALS1   | 0.34859   | 1.33E-06 |
| Macrophages M2 | PLD3     | 0.34772   | 1.41E-06 |
| Macrophages M2 | ARSB     | 0.347638  | 1.42E-06 |
| Macrophages M2 | ABCA1    | 0.344451  | 1.80E-06 |
| Macrophages M2 | PPT1     | 0.342478  | 2.08E-06 |
| Macrophages M2 | CYP1B1   | 0.32905   | 5.41E-06 |
| Macrophages M2 | RGL1     | 0.328938  | 5.46E-06 |
| Macrophages M2 | FMO1     | 0.327853  | 5.88E-06 |
| Macrophages M2 | LPL      | 0.326919  | 6.27E-06 |

|                   |          |          |          |
|-------------------|----------|----------|----------|
| Macrophages<br>M2 | BCAT1    | 0.325226 | 7.05E-06 |
| Macrophages<br>M2 | ZC3H12A  | -0.32374 | 7.80E-06 |
| Macrophages<br>M2 | DYNLL1   | 0.321408 | 9.15E-06 |
| Macrophages<br>M2 | ARSK     | 0.320528 | 9.71E-06 |
| Macrophages<br>M2 | NDUFS4   | 0.320458 | 9.75E-06 |
| Macrophages<br>M2 | P2RX7    | 0.317789 | 1.17E-05 |
| Macrophages<br>M2 | ALDH3A1  | -0.31681 | 1.25E-05 |
| Macrophages<br>M2 | ATP6V1B2 | 0.315466 | 1.36E-05 |
| Macrophages<br>M2 | RAB4A    | 0.315025 | 1.40E-05 |
| Macrophages<br>M2 | HEXB     | 0.311816 | 1.73E-05 |
| Macrophages<br>M2 | PTGIS    | 0.308593 | 2.14E-05 |
| Macrophages<br>M2 | HEXA     | 0.30788  | 2.24E-05 |
| Macrophages<br>M2 | EDNRA    | 0.306703 | 2.41E-05 |
| Macrophages<br>M2 | BCHE     | 0.304666 | 2.75E-05 |
| Macrophages<br>M2 | OSTC     | 0.303385 | 2.98E-05 |
| Macrophages<br>M2 | SLC5A5   | -0.30088 | 3.49E-05 |
| Macrophages<br>M2 | ADO      | 0.299017 | 3.93E-05 |
| Macrophages<br>M2 | SDS      | 0.294922 | 5.06E-05 |
| Macrophages<br>M2 | GNPDA2   | 0.288514 | 7.47E-05 |
| Macrophages<br>M2 | PRKD1    | 0.286449 | 8.45E-05 |
| Macrophages<br>M2 | NDUFA8   | 0.282293 | 0.000108 |
| Macrophages<br>M2 | DUOX2    | -0.28114 | 0.000116 |

|                   |           |          |          |
|-------------------|-----------|----------|----------|
| Macrophages<br>M2 | GABARAPL1 | 0.279862 | 0.000125 |
| Macrophages<br>M2 | H19       | 0.279811 | 0.000125 |
| Macrophages<br>M2 | ADH5      | 0.272575 | 0.000189 |
| Macrophages<br>M2 | GLIPR1    | 0.266191 | 0.00027  |
| Macrophages<br>M2 | GCKR      | -0.26534 | 0.000283 |
| Macrophages<br>M2 | TST       | -0.26524 | 0.000285 |
| Macrophages<br>M2 | APP       | 0.264964 | 0.000289 |
| Macrophages<br>M2 | PPP3CB    | 0.263648 | 0.000311 |
| Macrophages<br>M2 | SH3GLB1   | 0.262322 | 0.000334 |
| Macrophages<br>M2 | IGF1      | 0.26047  | 0.000369 |
| Macrophages<br>M2 | HNMT      | 0.258647 | 0.000407 |
| Macrophages<br>M2 | IGFBP4    | 0.25644  | 0.000458 |
| Macrophages<br>M2 | HACD1     | 0.255572 | 0.00048  |
| Macrophages<br>M2 | BPGM      | 0.255485 | 0.000482 |
| Macrophages<br>M2 | GPX7      | 0.254975 | 0.000495 |
| Macrophages<br>M2 | GGT5      | 0.254672 | 0.000503 |
| Macrophages<br>M2 | CYP2U1    | 0.254308 | 0.000513 |
| Macrophages<br>M2 | NUPR1     | 0.253352 | 0.000539 |
| Macrophages<br>M2 | GDPD3     | -0.25272 | 0.000557 |
| Macrophages<br>M2 | PRKAG1    | 0.252694 | 0.000558 |
| Macrophages<br>M2 | APOD      | 0.251189 | 0.000604 |
| Macrophages<br>M2 | PYGL      | 0.249031 | 0.000675 |

|                   |          |          |          |
|-------------------|----------|----------|----------|
| Macrophages<br>M2 | SLC25A10 | -0.24841 | 0.000697 |
| Macrophages<br>M2 | GPX1     | 0.248366 | 0.000699 |
| Macrophages<br>M2 | PITPNB   | 0.244007 | 0.000872 |
| Macrophages<br>M2 | SRR      | 0.242349 | 0.000948 |
| Macrophages<br>M2 | MDH1     | 0.241543 | 0.000988 |
| Macrophages<br>M2 | IGFBP3   | 0.240737 | 0.001028 |
| Macrophages<br>M2 | GNPDA1   | 0.240322 | 0.00105  |
| Macrophages<br>M2 | GHRL     | -0.24024 | 0.001054 |
| Macrophages<br>M2 | GPX2     | -0.23889 | 0.001127 |
| Macrophages<br>M2 | CA2      | -0.23819 | 0.001167 |
| Macrophages<br>M2 | RAB4B    | -0.23738 | 0.001214 |
| Macrophages<br>M2 | LRP1     | 0.236421 | 0.001272 |
| Macrophages<br>M2 | GGT1     | -0.2345  | 0.001397 |
| Macrophages<br>M2 | FA2H     | -0.23327 | 0.001483 |
| Macrophages<br>M2 | CXCL2    | -0.23279 | 0.001518 |
| Macrophages<br>M2 | ELOVL4   | 0.23255  | 0.001536 |
| Macrophages<br>M2 | CYP4F12  | -0.23199 | 0.001577 |
| Macrophages<br>M2 | SEC23A   | 0.23186  | 0.001587 |
| Macrophages<br>M2 | NDUFB2   | 0.231852 | 0.001588 |
| Macrophages<br>M2 | INMT     | 0.231024 | 0.001652 |
| Macrophages<br>M2 | CKMT1B   | -0.22993 | 0.001741 |
| Macrophages<br>M2 | CDO1     | 0.227811 | 0.001925 |

|                   |         |          |          |
|-------------------|---------|----------|----------|
| Macrophages<br>M2 | ELOVL5  | 0.227375 | 0.001965 |
| Macrophages<br>M2 | NDUFB5  | 0.226695 | 0.002029 |
| Macrophages<br>M2 | NDUFAF2 | 0.225738 | 0.002122 |
| Macrophages<br>M2 | GM2A    | 0.225497 | 0.002146 |
| Macrophages<br>M2 | CDK8    | 0.224927 | 0.002204 |
| Macrophages<br>M2 | PI4K2A  | 0.224345 | 0.002265 |
| Macrophages<br>M2 | SRI     | 0.224277 | 0.002272 |
| Macrophages<br>M2 | CBR3    | 0.22376  | 0.002327 |
| Macrophages<br>M2 | PSMD10  | 0.223505 | 0.002355 |
| Macrophages<br>M2 | ALDH1A3 | 0.222963 | 0.002415 |
| Macrophages<br>M2 | PCCA    | 0.222817 | 0.002431 |
| Macrophages<br>M2 | GPT     | -0.22266 | 0.002449 |
| Macrophages<br>M2 | CYP27A1 | 0.221815 | 0.002546 |
| Macrophages<br>M2 | CDIPT   | 0.221318 | 0.002605 |
| Macrophages<br>M2 | CLIP3   | 0.220371 | 0.002721 |
| Macrophages<br>M2 | ALDH1B1 | 0.219926 | 0.002777 |
| Macrophages<br>M2 | CYP2C9  | -0.21859 | 0.002951 |
| Macrophages<br>M2 | PPP2CB  | 0.217299 | 0.003129 |
| Macrophages<br>M2 | LIPF    | -0.21559 | 0.003379 |
| Macrophages<br>M2 | PIM3    | -0.21337 | 0.003731 |
| Macrophages<br>M2 | ATP1A2  | 0.211541 | 0.004045 |
| Macrophages<br>M2 | CYP3A5  | -0.21114 | 0.004117 |

|                   |         |          |          |
|-------------------|---------|----------|----------|
| Macrophages<br>M2 | CKMT1A  | -0.21024 | 0.004282 |
| Macrophages<br>M2 | RPL27   | 0.204106 | 0.005582 |
| Macrophages<br>M2 | PRKAB2  | 0.201946 | 0.006117 |
| Macrophages<br>M2 | PGM5    | 0.201784 | 0.006159 |
| Macrophages<br>M2 | SFN     | -0.20155 | 0.006219 |
| Macrophages<br>M2 | C1QTNF1 | 0.200281 | 0.00656  |
| Macrophages<br>M2 | DGKD    | -0.19974 | 0.006711 |
| Macrophages<br>M2 | RPS27L  | 0.199324 | 0.006828 |
| Macrophages<br>M2 | DHCR24  | -0.19893 | 0.00694  |
| Macrophages<br>M2 | NUCKS1  | 0.198583 | 0.007042 |
| Macrophages<br>M2 | ESRRA   | -0.19741 | 0.007393 |
| Macrophages<br>M2 | CYP2C18 | -0.19629 | 0.007741 |
| Macrophages<br>M2 | ADH7    | -0.19272 | 0.008956 |
| Macrophages<br>M2 | GLB1L   | 0.191583 | 0.009376 |
| Macrophages<br>M2 | PINK1   | 0.190232 | 0.009898 |
| Macrophages<br>M2 | CAV1    | 0.189239 | 0.010298 |
| Macrophages<br>M2 | SCD5    | 0.188752 | 0.010499 |
| Macrophages<br>M2 | RPS23   | 0.186882 | 0.011305 |
| Macrophages<br>M2 | FUT9    | -0.18295 | 0.013179 |
| Macrophages<br>M2 | SLC44A4 | -0.18241 | 0.013454 |
| Macrophages<br>M2 | SLC45A3 | -0.17995 | 0.014789 |
| Macrophages<br>M2 | ALDH2   | -0.17774 | 0.016081 |

|                   |         |          |          |
|-------------------|---------|----------|----------|
| Macrophages<br>M2 | FUT2    | -0.17769 | 0.016106 |
| Macrophages<br>M2 | PFKM    | 0.177673 | 0.016119 |
| Macrophages<br>M2 | CA4     | -0.17724 | 0.016386 |
| Macrophages<br>M2 | RORC    | -0.17652 | 0.016831 |
| Macrophages<br>M2 | MVD     | -0.17464 | 0.018055 |
| Macrophages<br>M2 | COMT    | 0.172225 | 0.019737 |
| Macrophages<br>M2 | PHLDA2  | -0.17213 | 0.019809 |
| Macrophages<br>M2 | TMEM86B | -0.17208 | 0.019843 |
| Macrophages<br>M2 | ILK     | 0.171164 | 0.020519 |
| Macrophages<br>M2 | RPL35A  | 0.170864 | 0.020744 |
| Macrophages<br>M2 | D2HGDH  | -0.17078 | 0.020806 |
| Macrophages<br>M2 | TBXAS1  | 0.169765 | 0.02159  |
| Macrophages<br>M2 | ABCC3   | -0.16921 | 0.022027 |
| Macrophages<br>M2 | STARD10 | -0.16756 | 0.02338  |
| Macrophages<br>M2 | RPS24   | 0.167442 | 0.023476 |
| Macrophages<br>M2 | ADH1B   | 0.165496 | 0.025162 |
| Macrophages<br>M2 | PASK    | -0.16532 | 0.025321 |
| Macrophages<br>M2 | ELOVL6  | -0.16461 | 0.025962 |
| Macrophages<br>M2 | SMPD3   | -0.164   | 0.026529 |
| Macrophages<br>M2 | DIO2    | 0.163456 | 0.027041 |
| Macrophages<br>M2 | FIS1    | 0.163264 | 0.027224 |
| Macrophages<br>M2 | GLYCTK  | -0.16319 | 0.027298 |

|                   |          |          |          |
|-------------------|----------|----------|----------|
| Macrophages<br>M2 | FAAH     | -0.16317 | 0.027313 |
| Macrophages<br>M2 | NQO1     | -0.16199 | 0.028467 |
| Macrophages<br>M2 | ASL      | -0.16165 | 0.028806 |
| Macrophages<br>M2 | ZAP70    | -0.16163 | 0.028827 |
| Macrophages<br>M2 | NDUFB11  | 0.160422 | 0.030057 |
| Macrophages<br>M2 | GPT2     | -0.1597  | 0.030812 |
| Macrophages<br>M2 | LEPR     | 0.158925 | 0.031647 |
| Macrophages<br>M2 | GLDC     | -0.15736 | 0.033389 |
| Macrophages<br>M2 | FOXA3    | -0.15148 | 0.040659 |
| Macrophages<br>M2 | MPST     | -0.15077 | 0.041621 |
| Macrophages<br>M2 | ALDH1A1  | -0.15042 | 0.042106 |
| Macrophages<br>M2 | PIK3C2G  | -0.15024 | 0.042351 |
| Macrophages<br>M2 | A4GALT   | 0.148898 | 0.044254 |
| Macrophages<br>M2 | GPD1     | -0.14877 | 0.044439 |
| Macrophages<br>M2 | MAPK10   | 0.148149 | 0.045345 |
| Macrophages<br>M2 | PNLIPRP2 | -0.14773 | 0.045961 |
| Macrophages<br>M2 | KCNB1    | 0.146997 | 0.047065 |
| Macrophages<br>M2 | CYP2C8   | -0.14671 | 0.047503 |
| Macrophages<br>M2 | NDUFB6   | 0.145467 | 0.049434 |
| Macrophages<br>M2 | PICK1    | -0.14537 | 0.049583 |
