# Supplementary material for: Identification and Validation of a Metabolism-Related Prognostic Signature Associated with M2 Macrophage Infiltration in Gastric Cancer
Source: Int J Mol Sci. 2023 Jun 25;24(13):10625. doi: 10.3390/ijms241310625 (PMC10342140; doi:10.3390/ijms241310625)
Supplement: Supplementary file 1 [file ijms-24-10625-s001.zip]

Archive with 6 entries (6 files):
- Supplemental figures and figure legends.pdf
- Supplementary file S1.pdf
- Supplementary file S2.pdf
- Supplementary file S3.pdf
- Supplementary file S4.pdf
- Supplementary file S5 .pdf
